# Supplementary material
Source: PubMed Central journal article supplement (PMC7919334)

**SUPPLEMENTARY MATERIALS**

**Supplementary Table 1: FA genes ranked by aggregated carrier frequency for potentially pathogenic germline variants in the Singaporean population and 7 selected ancestry groups from gnomAD<sup>a</sup>**

| SG<br>(n=3,523)                              |    |                  | EAS<br>(n=8,750) |    |                  | SAS<br>(n=15,067) |    |                  | AFR<br>(n=7,326) |    |                  | NFE<br>(n=50,621) |     |                  | FIN<br>(n=10,664) |     |                  | ASJ<br>(n=4,738) |    |                  | AMR<br>(n=16,907) |     |                  |      |    |                  |
|----------------------------------------------|----|------------------|------------------|----|------------------|-------------------|----|------------------|------------------|----|------------------|-------------------|-----|------------------|-------------------|-----|------------------|------------------|----|------------------|-------------------|-----|------------------|------|----|------------------|
| Gene                                         | CC | CF (per 100,000) | Gene             | CC | CF (per 100,000) | Gene              | CC | CF (per 100,000) | Gene             | CC | CF (per 100,000) | Gene              | CC  | CF (per 100,000) | Gene              | CC  | CF (per 100,000) | Gene             | CC | CF (per 100,000) | Gene              | CC  | CF (per 100,000) | Gene | CC | CF (per 100,000) |
| <i>FANCA</i>                                 | 35 | 993              | <i>FANCA</i>     | 58 | 663              | <i>FANCM</i>      | 95 | 631              | <i>FANCA</i>     | 36 | 491              | <i>FANCA</i>      | 636 | 1256             | <i>FANCM</i>      | 288 | 2701             | <i>FANCL</i>     | 68 | 1435             | <i>FANCL</i>      | 206 | 1218             |      |    |                  |
| <i>FANCM</i>                                 | 7  | 199              | <i>SLX4</i>      | 25 | 286              | <i>FANCA</i>      | 89 | 591              | <i>FANCD2</i>    | 27 | 369              | <i>FANCL</i>      | 397 | 784              | <i>FANCI</i>      | 97  | 910              | <i>FANCA</i>     | 26 | 549              | <i>FANCD2</i>     | 164 | 970              |      |    |                  |
| <i>FANCD2</i>                                | 5  | 142              | <i>ERCC4</i>     | 19 | 217              | <i>FANCG</i>      | 85 | 564              | <i>FANCI</i>     | 25 | 341              | <i>FANCM</i>      | 360 | 711              | <i>FANCA</i>      | 42  | 394              | <i>FANCD2</i>    | 6  | 127              | <i>FANCA</i>      | 134 | 793              |      |    |                  |
| <i>FANCG</i>                                 | 5  | 142              | <i>FANCI</i>     | 18 | 206              | <i>ERCC4</i>      | 53 | 352              | <i>FANCL</i>     | 24 | 328              | <i>FANCI</i>      | 168 | 332              | <i>FANCL</i>      | 39  | 366              | <i>XRCC2</i>     | 4  | 84               | <i>FANCI</i>      | 68  | 402              |      |    |                  |
| <i>XRCC2</i>                                 | 4  | 114              | <i>FANCM</i>     | 15 | 171              | <i>FANCI</i>      | 45 | 299              | <i>FANCM</i>     | 20 | 273              | <i>FANCD2</i>     | 111 | 219              | <i>FANCD2</i>     | 13  | 122              | <i>ERCC4</i>     | 3  | 63               | <i>FANCM</i>      | 48  | 284              |      |    |                  |
| <i>SLX4</i>                                  | 3  | 85               | <i>FANCD2</i>    | 14 | 160              | <i>FANCL</i>      | 40 | 265              | <i>RAD51</i>     | 17 | 232              | <i>ERCC4</i>      | 105 | 207              | <i>ERCC4</i>      | 7   | 66               | <i>FANCI</i>     | 2  | 42               | <i>ERCC4</i>      | 25  | 148              |      |    |                  |
| <i>UBE2T</i>                                 | 3  | 85               | <i>RFWD3</i>     | 9  | 103              | <i>SLX4</i>       | 28 | 186              | <i>ERCC4</i>     | 14 | 191              | <i>FANCG</i>      | 84  | 166              | <i>SLX4</i>       | 6   | 56               | <i>FANCC</i>     | 1  | 21               | <i>XRCC2</i>      | 23  | 136              |      |    |                  |
| <i>FANCC</i>                                 | 2  | 57               | <i>FANCG</i>     | 8  | 91               | <i>FANCD2</i>     | 23 | 153              | <i>FANCC</i>     | 12 | 164              | <i>FANCC</i>      | 80  | 158              | <i>XRCC2</i>      | 6   | 56               | <i>FANCE</i>     | 1  | 21               | <i>SLX4</i>       | 20  | 118              |      |    |                  |
| <i>FANCI</i>                                 | 2  | 57               | <i>FANCL</i>     | 7  | 80               | <i>FANCC</i>      | 16 | 106              | <i>FANCG</i>     | 10 | 137              | <i>SLX4</i>       | 77  | 152              | <i>FANCG</i>      | 4   | 38               | <i>MAD2L2</i>    | 1  | 21               | <i>FANCC</i>      | 14  | 83               |      |    |                  |
| <i>FANCL</i>                                 | 2  | 57               | <i>UBE2T</i>     | 7  | 80               | <i>FANCE</i>      | 13 | 86               | <i>FANCF</i>     | 6  | 82               | <i>XRCC2</i>      | 61  | 121              | <i>FANCC</i>      | 2   | 19               | <i>RFWD3</i>     | 1  | 21               | <i>FANCG</i>      | 14  | 83               |      |    |                  |
| <i>ERCC4</i>                                 | 2  | 57               | <i>FANCC</i>     | 5  | 57               | <i>FANCF</i>      | 10 | 66               | <i>RFWD3</i>     | 6  | 82               | <i>FANCF</i>      | 40  | 79               | <i>FANCF</i>      | 1   | 9                | <i>FANCB</i>     | 0  | 0                | <i>FANCF</i>      | 8   | 47               |      |    |                  |
| <i>RAD51</i>                                 | 1  | 28               | <i>FANCF</i>     | 5  | 57               | <i>RFWD3</i>      | 10 | 66               | <i>FANCE</i>     | 5  | 68               | <i>RFWD3</i>      | 29  | 57               | <i>RAD51</i>      | 1   | 9                | <i>FANCF</i>     | 0  | 0                | <i>UBE2T</i>      | 8   | 47               |      |    |                  |
| <i>RFWD3</i>                                 | 1  | 28               | <i>MAD2L2</i>    | 3  | 34               | <i>XRCC2</i>      | 8  | 53               | <i>UBE2T</i>     | 5  | 68               | <i>FANCE</i>      | 21  | 41               | <i>UBE2T</i>      | 1   | 9                | <i>FANCG</i>     | 0  | 0                | <i>RFWD3</i>      | 6   | 35               |      |    |                  |
| <i>FANCB</i>                                 | 0  | 0                | <i>FANCE</i>     | 1  | 11               | <i>RAD51</i>      | 3  | 20               | <i>SLX4</i>      | 3  | 41               | <i>MAD2L2</i>     | 13  | 26               | <i>RFWD3</i>      | 1   | 9                | <i>FANCM</i>     | 0  | 0                | <i>FANCE</i>      | 4   | 24               |      |    |                  |
| <i>FANCE</i>                                 | 0  | 0                | <i>RAD51</i>     | 1  | 11               | <i>UBE2T</i>      | 3  | 20               | <i>XRCC2</i>     | 2  | 27               | <i>UBE2T</i>      | 11  | 22               | <i>FANCB</i>      | 0   | 0                | <i>SLX4</i>      | 0  | 0                | <i>RAD51</i>      | 1   | 6                |      |    |                  |
| <i>FANCF</i>                                 | 0  | 0                | <i>XRCC2</i>     | 1  | 11               | <i>MAD2L2</i>     | 1  | 7                | <i>MAD2L2</i>    | 2  | 27               | <i>RAD51</i>      | 2   | 4                | <i>FANCE</i>      | 0   | 0                | <i>RAD51</i>     | 0  | 0                | <i>MAD2L2</i>     | 1   | 6                |      |    |                  |
| <i>MAD2L2</i>                                | 0  | 0                | <i>FANCB</i>     | 0  | 0                | <i>FANCB</i>      | 0  | 0                | <i>FANCB</i>     | 0  | 0                | <i>FANCB</i>      | 0   | 0                | <i>MAD2L2</i>     | 0   | 0                | <i>UBE2T</i>     | 0  | 0                | <i>FANCB</i>      | 0   | 0                |      |    |                  |
| Total carriers (% , adjusted to cohort size) |    |                  |                  |    |                  |                   |    |                  |                  |    |                  |                   |     |                  |                   |     |                  |                  |    |                  |                   |     |                  |      |    |                  |
| 72 (2.0%)                                    |    |                  | 196 (2.2%)       |    |                  | 522 (3.5%)        |    |                  | 214 (2.9%)       |    |                  | 2195 (4.3%)       |     |                  | 508 (4.8%)        |     |                  | 113 (2.4%)       |    |                  | 744 (4.4%)        |     |                  |      |    |                  |

<sup>a</sup> SG: Singaporean, EAS: East Asian, SAS: South Asian, AFR: African-American, NFE: Non-Finnish European, FIN: Finnish European, ASJ: Ashkenazi Jewish, AMR: Admixed-American, CC: Carrier count, CF: Carrier frequency.



**Supplementary Table 2: Pairwise differences in proportion of germline variant carrier frequency in the 8 ancestry groups evaluated by two-tailed Fisher's exact test, with Bonferroni correction for multiple testing (448 tests)<sup>a</sup>**

| No. | Gene  | Ancestry group 1 | Cohort size-normalized carrier frequency (Ancestry group 1) | Ancestry group 2 | Cohort size-normalized carrier frequency (Ancestry group 2) | Unadjusted p-value | Bonferroni-corrected p-value |
|-----|-------|------------------|-------------------------------------------------------------|------------------|-------------------------------------------------------------|--------------------|------------------------------|
| 1   | FANCA | SG               | 9.93E-03                                                    | AFR              | 4.91E-03                                                    | 0.006              | 1                            |
| 2   | FANCA | SG               | 9.93E-03                                                    | AMR              | 7.93E-03                                                    | 0.261              | 1                            |
| 3   | FANCA | SG               | 9.93E-03                                                    | ASJ              | 5.49E-03                                                    | 0.041              | 1                            |
| 4   | FANCA | SG               | 9.93E-03                                                    | EAS              | 6.63E-03                                                    | 0.085              | 1                            |
| 5   | FANCA | SG               | 9.93E-03                                                    | FIN              | 3.94E-03                                                    | 9.00E-05           | 0.040                        |
| 6   | FANCA | SG               | 9.93E-03                                                    | NFE              | 1.26E-02                                                    | 0.159              | 1                            |
| 7   | FANCA | SG               | 9.93E-03                                                    | SAS              | 5.91E-03                                                    | 0.011              | 1                            |
| 8   | FANCA | AFR              | 4.91E-03                                                    | AMR              | 7.93E-03                                                    | 0.020              | 1                            |
| 9   | FANCA | AFR              | 4.91E-03                                                    | ASJ              | 5.49E-03                                                    | 0.615              | 1                            |
| 10  | FANCA | AFR              | 4.91E-03                                                    | EAS              | 6.63E-03                                                    | 0.221              | 1                            |
| 11  | FANCA | AFR              | 4.91E-03                                                    | FIN              | 3.94E-03                                                    | 0.254              | 1                            |
| 12  | FANCA | AFR              | 4.91E-03                                                    | NFE              | 1.26E-02                                                    | 6.6E-10            | 2.96E-07                     |
| 13  | FANCA | AFR              | 4.91E-03                                                    | SAS              | 5.91E-03                                                    | 0.570              | 1                            |
| 14  | FANCA | AMR              | 7.93E-03                                                    | ASJ              | 5.49E-03                                                    | 0.154              | 1                            |
| 15  | FANCA | AMR              | 7.93E-03                                                    | EAS              | 6.63E-03                                                    | 0.288              | 1                            |
| 16  | FANCA | AMR              | 7.93E-03                                                    | FIN              | 3.94E-03                                                    | 2.60E-05           | 1.16E-02                     |
| 17  | FANCA | AMR              | 7.93E-03                                                    | NFE              | 1.26E-02                                                    | 1.60E-07           | 7.17E-05                     |
| 18  | FANCA | AMR              | 7.93E-03                                                    | SAS              | 5.91E-03                                                    | 0.027              | 1                            |
| 19  | FANCA | ASJ              | 5.49E-03                                                    | EAS              | 6.63E-03                                                    | 0.652              | 1                            |
| 20  | FANCA | ASJ              | 5.49E-03                                                    | FIN              | 3.94E-03                                                    | 0.118              | 1                            |
| 21  | FANCA | ASJ              | 5.49E-03                                                    | NFE              | 1.26E-02                                                    | 8.50E-06           | 3.81E-03                     |
| 22  | FANCA | ASJ              | 5.49E-03                                                    | SAS              | 5.91E-03                                                    | 1                  | 1                            |
| 23  | FANCA | EAS              | 6.63E-03                                                    | FIN              | 3.94E-03                                                    | 0.009              | 1                            |
| 24  | FANCA | EAS              | 6.63E-03                                                    | NFE              | 1.26E-02                                                    | 3.40E-07           | 1.52E-04                     |
| 25  | FANCA | EAS              | 6.63E-03                                                    | SAS              | 5.91E-03                                                    | 0.442              | 1                            |

| No. | Gene         | Ancestry group 1 | Cohort size-normalized carrier frequency (Ancestry group 1) | Ancestry group 2 | Cohort size-normalized carrier frequency (Ancestry group 2) | Unadjusted p-value | Bonferroni-corrected p-value |
|-----|--------------|------------------|-------------------------------------------------------------|------------------|-------------------------------------------------------------|--------------------|------------------------------|
| 26  | <i>FANCA</i> | FIN              | 3.94E-03                                                    | NFE              | 1.26E-02                                                    | <2.00E-16          | <9.00E-14                    |
| 27  | <i>FANCA</i> | FIN              | 3.94E-03                                                    | SAS              | 5.91E-03                                                    | 0.033              | 1                            |
| 28  | <i>FANCA</i> | NFE              | 1.26E-02                                                    | SAS              | 5.91E-03                                                    | 6.10E-14           | 2.73E-11                     |
| 29  | <i>FANCC</i> | SG               | 5.68E-04                                                    | AFR              | 1.64E-03                                                    | 0.251              | 1                            |
| 30  | <i>FANCC</i> | SG               | 5.68E-04                                                    | AMR              | 8.28E-04                                                    | 0.414              | 1                            |
| 31  | <i>FANCC</i> | SG               | 5.68E-04                                                    | ASJ              | 2.11E-04                                                    | 0.579              | 1                            |
| 32  | <i>FANCC</i> | SG               | 5.68E-04                                                    | EAS              | 5.71E-04                                                    | 1                  | 1                            |
| 33  | <i>FANCC</i> | SG               | 5.68E-04                                                    | FIN              | 1.88E-04                                                    | 0.259              | 1                            |
| 34  | <i>FANCC</i> | SG               | 5.68E-04                                                    | NFE              | 1.58E-03                                                    | 0.176              | 1                            |
| 35  | <i>FANCC</i> | SG               | 5.68E-04                                                    | SAS              | 1.06E-03                                                    | 0.557              | 1                            |
| 36  | <i>FANCC</i> | AFR              | 1.64E-03                                                    | AMR              | 8.28E-04                                                    | 0.575              | 1                            |
| 37  | <i>FANCC</i> | AFR              | 1.64E-03                                                    | ASJ              | 2.11E-04                                                    | 0.021              | 1                            |
| 38  | <i>FANCC</i> | AFR              | 1.64E-03                                                    | EAS              | 5.71E-04                                                    | 0.050              | 1                            |
| 39  | <i>FANCC</i> | AFR              | 1.64E-03                                                    | FIN              | 1.88E-04                                                    | 0.001              | 0.627                        |
| 40  | <i>FANCC</i> | AFR              | 1.64E-03                                                    | NFE              | 1.58E-03                                                    | 0.875              | 1                            |
| 41  | <i>FANCC</i> | AFR              | 1.64E-03                                                    | SAS              | 1.06E-03                                                    | 0.326              | 1                            |
| 42  | <i>FANCC</i> | AMR              | 8.28E-04                                                    | ASJ              | 2.11E-04                                                    | 0.042              | 1                            |
| 43  | <i>FANCC</i> | AMR              | 8.28E-04                                                    | EAS              | 5.71E-04                                                    | 0.105              | 1                            |
| 44  | <i>FANCC</i> | AMR              | 8.28E-04                                                    | FIN              | 1.88E-04                                                    | 0.001              | 0.582                        |
| 45  | <i>FANCC</i> | AMR              | 8.28E-04                                                    | NFE              | 1.58E-03                                                    | 0.493              | 1                            |
| 46  | <i>FANCC</i> | AMR              | 8.28E-04                                                    | SAS              | 1.06E-03                                                    | 0.749              | 1                            |
| 47  | <i>FANCC</i> | ASJ              | 2.11E-04                                                    | EAS              | 5.71E-04                                                    | 0.672              | 1                            |
| 48  | <i>FANCC</i> | ASJ              | 2.11E-04                                                    | FIN              | 1.88E-04                                                    | 1                  | 1                            |
| 49  | <i>FANCC</i> | ASJ              | 2.11E-04                                                    | NFE              | 1.58E-03                                                    | 0.015              | 1                            |
| 50  | <i>FANCC</i> | ASJ              | 2.11E-04                                                    | SAS              | 1.06E-03                                                    | 0.093              | 1                            |
| 51  | <i>FANCC</i> | EAS              | 5.71E-04                                                    | FIN              | 1.88E-04                                                    | 0.256              | 1                            |
| 52  | <i>FANCC</i> | EAS              | 5.71E-04                                                    | NFE              | 1.58E-03                                                    | 0.020              | 1                            |

| No. | Gene          | Ancestry group 1 | Cohort size-normalized carrier frequency (Ancestry group 1) | Ancestry group 2 | Cohort size-normalized carrier frequency (Ancestry group 2) | Unadjusted p-value | Bonferroni-corrected p-value |
|-----|---------------|------------------|-------------------------------------------------------------|------------------|-------------------------------------------------------------|--------------------|------------------------------|
| 53  | <i>FANCC</i>  | EAS              | 5.71E-04                                                    | SAS              | 1.06E-03                                                    | 0.192              | 1                            |
| 54  | <i>FANCC</i>  | FIN              | 1.88E-04                                                    | NFE              | 1.58E-03                                                    | 5.20E-05           | 0.023                        |
| 55  | <i>FANCC</i>  | FIN              | 1.88E-04                                                    | SAS              | 1.06E-03                                                    | 0.005              | 1                            |
| 56  | <i>FANCC</i>  | NFE              | 1.58E-03                                                    | SAS              | 1.06E-03                                                    | 0.228              | 1                            |
| 57  | <i>FANCD2</i> | SG               | 1.42E-03                                                    | AFR              | 3.69E-03                                                    | 0.039              | 1                            |
| 58  | <i>FANCD2</i> | SG               | 1.42E-03                                                    | AMR              | 9.70E-03                                                    | 8.7E-09            | 3.90E-06                     |
| 59  | <i>FANCD2</i> | SG               | 1.42E-03                                                    | ASJ              | 1.27E-03                                                    | 1                  | 1                            |
| 60  | <i>FANCD2</i> | SG               | 1.42E-03                                                    | EAS              | 1.60E-03                                                    | 1                  | 1                            |
| 61  | <i>FANCD2</i> | SG               | 1.42E-03                                                    | FIN              | 1.22E-03                                                    | 0.786              | 1                            |
| 62  | <i>FANCD2</i> | SG               | 1.42E-03                                                    | NFE              | 2.19E-03                                                    | 0.450              | 1                            |
| 63  | <i>FANCD2</i> | SG               | 1.42E-03                                                    | SAS              | 1.53E-03                                                    | 1                  | 1                            |
| 64  | <i>FANCD2</i> | AFR              | 3.69E-03                                                    | AMR              | 9.70E-03                                                    | 5.30E-07           | 2.37E-04                     |
| 65  | <i>FANCD2</i> | AFR              | 3.69E-03                                                    | ASJ              | 1.27E-03                                                    | 0.013              | 1                            |
| 66  | <i>FANCD2</i> | AFR              | 3.69E-03                                                    | EAS              | 1.60E-03                                                    | 0.008              | 1                            |
| 67  | <i>FANCD2</i> | AFR              | 3.69E-03                                                    | FIN              | 1.22E-03                                                    | 6.20E-04           | 0.278                        |
| 68  | <i>FANCD2</i> | AFR              | 3.69E-03                                                    | NFE              | 2.19E-03                                                    | 0.014              | 1                            |
| 69  | <i>FANCD2</i> | AFR              | 3.69E-03                                                    | SAS              | 1.53E-03                                                    | 0.001              | 0.632                        |
| 70  | <i>FANCD2</i> | AMR              | 9.70E-03                                                    | ASJ              | 1.27E-03                                                    | 1.7E-11            | 7.62E-09                     |
| 71  | <i>FANCD2</i> | AMR              | 9.70E-03                                                    | EAS              | 1.60E-03                                                    | <2.00E-16          | 9.12E-14                     |
| 72  | <i>FANCD2</i> | AMR              | 9.70E-03                                                    | FIN              | 1.22E-03                                                    | <2.00E-16          | <9.00E-14                    |
| 73  | <i>FANCD2</i> | AMR              | 9.70E-03                                                    | NFE              | 2.19E-03                                                    | <2.00E-16          | <9.00E-14                    |
| 74  | <i>FANCD2</i> | AMR              | 9.70E-03                                                    | SAS              | 1.53E-03                                                    | <2.00E-16          | <9.00E-14                    |
| 75  | <i>FANCD2</i> | ASJ              | 1.27E-03                                                    | EAS              | 1.60E-03                                                    | 0.815              | 1                            |
| 76  | <i>FANCD2</i> | ASJ              | 1.27E-03                                                    | FIN              | 1.22E-03                                                    | 1                  | 1                            |
| 77  | <i>FANCD2</i> | ASJ              | 1.27E-03                                                    | NFE              | 2.19E-03                                                    | 0.244              | 1                            |
| 78  | <i>FANCD2</i> | ASJ              | 1.27E-03                                                    | SAS              | 1.53E-03                                                    | 0.829              | 1                            |
| 79  | <i>FANCD2</i> | EAS              | 1.60E-03                                                    | FIN              | 1.22E-03                                                    | 0.563              | 1                            |

| No. | Gene          | Ancestry group 1 | Cohort size-normalized carrier frequency (Ancestry group 1) | Ancestry group 2 | Cohort size-normalized carrier frequency (Ancestry group 2) | Unadjusted p-value | Bonferroni-corrected p-value |
|-----|---------------|------------------|-------------------------------------------------------------|------------------|-------------------------------------------------------------|--------------------|------------------------------|
| 80  | <i>FANCD2</i> | EAS              | 1.60E-03                                                    | NFE              | 2.19E-03                                                    | 0.312              | 1                            |
| 81  | <i>FANCD2</i> | EAS              | 1.60E-03                                                    | SAS              | 1.53E-03                                                    | 0.866              | 1                            |
| 82  | <i>FANCD2</i> | FIN              | 1.22E-03                                                    | NFE              | 2.19E-03                                                    | 0.043              | 1                            |
| 83  | <i>FANCD2</i> | FIN              | 1.22E-03                                                    | SAS              | 1.53E-03                                                    | 0.613              | 1                            |
| 84  | <i>FANCD2</i> | NFE              | 2.19E-03                                                    | SAS              | 1.53E-03                                                    | 0.123              | 1                            |
| 85  | <i>FANCE</i>  | SG               | 0                                                           | AFR              | 6.83E-04                                                    | 0.013              | 1                            |
| 86  | <i>FANCE</i>  | SG               | 0                                                           | AMR              | 2.37E-04                                                    | 0.612              | 1                            |
| 87  | <i>FANCE</i>  | SG               | 0                                                           | ASJ              | 2.11E-04                                                    | 1                  | 1                            |
| 88  | <i>FANCE</i>  | SG               | 0                                                           | EAS              | 1.14E-04                                                    | 1                  | 1                            |
| 89  | <i>FANCE</i>  | SG               | 0                                                           | FIN              | 0                                                           | 1                  | 1                            |
| 90  | <i>FANCE</i>  | SG               | 0                                                           | NFE              | 4.15E-04                                                    | 0.397              | 1                            |
| 91  | <i>FANCE</i>  | SG               | 0                                                           | SAS              | 8.63E-04                                                    | 0.087              | 1                            |
| 92  | <i>FANCE</i>  | AFR              | 6.83E-04                                                    | AMR              | 2.37E-04                                                    | 0.002              | 0.950                        |
| 93  | <i>FANCE</i>  | AFR              | 6.83E-04                                                    | ASJ              | 2.11E-04                                                    | 0.013              | 1                            |
| 94  | <i>FANCE</i>  | AFR              | 6.83E-04                                                    | EAS              | 1.14E-04                                                    | 4.90E-04           | 0.220                        |
| 95  | <i>FANCE</i>  | AFR              | 6.83E-04                                                    | FIN              | 0                                                           | 8.40E-06           | 3.76E-03                     |
| 96  | <i>FANCE</i>  | AFR              | 6.83E-04                                                    | NFE              | 4.15E-04                                                    | 2.00E-04           | 0.090                        |
| 97  | <i>FANCE</i>  | AFR              | 6.83E-04                                                    | SAS              | 8.63E-04                                                    | 0.101              | 1                            |
| 98  | <i>FANCE</i>  | AMR              | 2.37E-04                                                    | ASJ              | 2.11E-04                                                    | 1                  | 1                            |
| 99  | <i>FANCE</i>  | AMR              | 2.37E-04                                                    | EAS              | 1.14E-04                                                    | 0.279              | 1                            |
| 100 | <i>FANCE</i>  | AMR              | 2.37E-04                                                    | FIN              | 0                                                           | 0.048              | 1                            |
| 101 | <i>FANCE</i>  | AMR              | 2.37E-04                                                    | NFE              | 4.15E-04                                                    | 1                  | 1                            |
| 102 | <i>FANCE</i>  | AMR              | 2.37E-04                                                    | SAS              | 8.63E-04                                                    | 0.082              | 1                            |
| 103 | <i>FANCE</i>  | ASJ              | 2.11E-04                                                    | EAS              | 1.14E-04                                                    | 1                  | 1                            |
| 104 | <i>FANCE</i>  | ASJ              | 2.11E-04                                                    | FIN              | 0                                                           | 0.308              | 1                            |
| 105 | <i>FANCE</i>  | ASJ              | 2.11E-04                                                    | NFE              | 4.15E-04                                                    | 0.717              | 1                            |
| 106 | <i>FANCE</i>  | ASJ              | 2.11E-04                                                    | SAS              | 8.63E-04                                                    | 0.140              | 1                            |

| No. | Gene         | Ancestry group 1 | Cohort size-normalized carrier frequency (Ancestry group 1) | Ancestry group 2 | Cohort size-normalized carrier frequency (Ancestry group 2) | Unadjusted p-value | Bonferroni-corrected p-value |
|-----|--------------|------------------|-------------------------------------------------------------|------------------|-------------------------------------------------------------|--------------------|------------------------------|
| 107 | <i>FANCE</i> | EAS              | 1.14E-04                                                    | FIN              | 0                                                           | 0.451              | 1                            |
| 108 | <i>FANCE</i> | EAS              | 1.14E-04                                                    | NFE              | 4.15E-04                                                    | 0.238              | 1                            |
| 109 | <i>FANCE</i> | EAS              | 1.14E-04                                                    | SAS              | 8.63E-04                                                    | 0.014              | 1                            |
| 110 | <i>FANCE</i> | FIN              | 0                                                           | NFE              | 4.15E-04                                                    | 0.023              | 1                            |
| 111 | <i>FANCE</i> | FIN              | 0                                                           | SAS              | 8.63E-04                                                    | 6.50E-04           | 0.291                        |
| 112 | <i>FANCE</i> | NFE              | 4.15E-04                                                    | SAS              | 8.63E-04                                                    | 0.029              | 1                            |
| 113 | <i>FANCF</i> | SG               | 0                                                           | AFR              | 8.19E-04                                                    | 0.187              | 1                            |
| 114 | <i>FANCF</i> | SG               | 0                                                           | AMR              | 4.73E-04                                                    | 0.366              | 1                            |
| 115 | <i>FANCF</i> | SG               | 0                                                           | ASJ              | 0                                                           | 1                  | 1                            |
| 116 | <i>FANCF</i> | SG               | 0                                                           | EAS              | 5.71E-04                                                    | 0.331              | 1                            |
| 117 | <i>FANCF</i> | SG               | 0                                                           | FIN              | 9.38E-05                                                    | 1                  | 1                            |
| 118 | <i>FANCF</i> | SG               | 0                                                           | NFE              | 7.90E-04                                                    | 0.111              | 1                            |
| 119 | <i>FANCF</i> | SG               | 0                                                           | SAS              | 6.64E-04                                                    | 0.225              | 1                            |
| 120 | <i>FANCF</i> | AFR              | 8.19E-04                                                    | AMR              | 4.73E-04                                                    | 0.382              | 1                            |
| 121 | <i>FANCF</i> | AFR              | 8.19E-04                                                    | ASJ              | 0                                                           | 0.088              | 1                            |
| 122 | <i>FANCF</i> | AFR              | 8.19E-04                                                    | EAS              | 5.71E-04                                                    | 0.562              | 1                            |
| 123 | <i>FANCF</i> | AFR              | 8.19E-04                                                    | FIN              | 9.38E-05                                                    | 0.021              | 1                            |
| 124 | <i>FANCF</i> | AFR              | 8.19E-04                                                    | NFE              | 7.90E-04                                                    | 1                  | 1                            |
| 125 | <i>FANCF</i> | AFR              | 8.19E-04                                                    | SAS              | 6.64E-04                                                    | 0.791              | 1                            |
| 126 | <i>FANCF</i> | AMR              | 4.73E-04                                                    | ASJ              | 0                                                           | 0.214              | 1                            |
| 127 | <i>FANCF</i> | AMR              | 4.73E-04                                                    | EAS              | 5.71E-04                                                    | 0.773              | 1                            |
| 128 | <i>FANCF</i> | AMR              | 4.73E-04                                                    | FIN              | 9.38E-05                                                    | 0.167              | 1                            |
| 129 | <i>FANCF</i> | AMR              | 4.73E-04                                                    | NFE              | 7.90E-04                                                    | 0.188              | 1                            |
| 130 | <i>FANCF</i> | AMR              | 4.73E-04                                                    | SAS              | 6.64E-04                                                    | 0.490              | 1                            |
| 131 | <i>FANCF</i> | ASJ              | 0                                                           | EAS              | 5.71E-04                                                    | 0.170              | 1                            |
| 132 | <i>FANCF</i> | ASJ              | 0                                                           | FIN              | 9.38E-05                                                    | 1                  | 1                            |
| 133 | <i>FANCF</i> | ASJ              | 0                                                           | NFE              | 7.90E-04                                                    | 0.047              | 1                            |

| No. | Gene         | Ancestry group 1 | Cohort size-normalized carrier frequency (Ancestry group 1) | Ancestry group 2 | Cohort size-normalized carrier frequency (Ancestry group 2) | Unadjusted p-value | Bonferroni-corrected p-value |
|-----|--------------|------------------|-------------------------------------------------------------|------------------|-------------------------------------------------------------|--------------------|------------------------------|
| 134 | <i>FANCF</i> | ASJ              | 0                                                           | SAS              | 6.64E-04                                                    | 0.131              | 1                            |
| 135 | <i>FANCF</i> | EAS              | 5.71E-04                                                    | FIN              | 9.38E-05                                                    | 0.097              | 1                            |
| 136 | <i>FANCF</i> | EAS              | 5.71E-04                                                    | NFE              | 7.90E-04                                                    | 0.676              | 1                            |
| 137 | <i>FANCF</i> | EAS              | 5.71E-04                                                    | SAS              | 6.64E-04                                                    | 1                  | 1                            |
| 138 | <i>FANCF</i> | FIN              | 9.38E-05                                                    | NFE              | 7.90E-04                                                    | 0.007              | 1                            |
| 139 | <i>FANCF</i> | FIN              | 9.38E-05                                                    | SAS              | 6.64E-04                                                    | 0.032              | 1                            |
| 140 | <i>FANCF</i> | NFE              | 7.90E-04                                                    | SAS              | 6.64E-04                                                    | 0.739              | 1                            |
| 141 | <i>FANCG</i> | SG               | 1.42E-03                                                    | AFR              | 1.37E-03                                                    | 1                  | 1                            |
| 142 | <i>FANCG</i> | SG               | 1.42E-03                                                    | AMR              | 8.28E-04                                                    | 0.355              | 1                            |
| 143 | <i>FANCG</i> | SG               | 1.42E-03                                                    | ASJ              | 0                                                           | 0.014              | 1                            |
| 144 | <i>FANCG</i> | SG               | 1.42E-03                                                    | EAS              | 9.14E-04                                                    | 0.539              | 1                            |
| 145 | <i>FANCG</i> | SG               | 1.42E-03                                                    | FIN              | 3.75E-04                                                    | 0.048              | 1                            |
| 146 | <i>FANCG</i> | SG               | 1.42E-03                                                    | NFE              | 1.66E-03                                                    | 1                  | 1                            |
| 147 | <i>FANCG</i> | SG               | 1.42E-03                                                    | SAS              | 5.64E-03                                                    | 3.90E-04           | 0.175                        |
| 148 | <i>FANCG</i> | AFR              | 1.37E-03                                                    | AMR              | 8.28E-04                                                    | 0.265              | 1                            |
| 149 | <i>FANCG</i> | AFR              | 1.37E-03                                                    | ASJ              | 0                                                           | 0.008              | 1                            |
| 150 | <i>FANCG</i> | AFR              | 1.37E-03                                                    | EAS              | 9.14E-04                                                    | 0.480              | 1                            |
| 151 | <i>FANCG</i> | AFR              | 1.37E-03                                                    | FIN              | 3.75E-04                                                    | 0.027              | 1                            |
| 152 | <i>FANCG</i> | AFR              | 1.37E-03                                                    | NFE              | 1.66E-03                                                    | 0.643              | 1                            |
| 153 | <i>FANCG</i> | AFR              | 1.37E-03                                                    | SAS              | 5.64E-03                                                    | 8.00E-07           | 3.58E-04                     |
| 154 | <i>FANCG</i> | AMR              | 8.28E-04                                                    | ASJ              | 0                                                           | 0.050              | 1                            |
| 155 | <i>FANCG</i> | AMR              | 8.28E-04                                                    | EAS              | 9.14E-04                                                    | 0.824              | 1                            |
| 156 | <i>FANCG</i> | AMR              | 8.28E-04                                                    | FIN              | 3.75E-04                                                    | 0.225              | 1                            |
| 157 | <i>FANCG</i> | AMR              | 8.28E-04                                                    | NFE              | 1.66E-03                                                    | 0.014              | 1                            |
| 158 | <i>FANCG</i> | AMR              | 8.28E-04                                                    | SAS              | 5.64E-03                                                    | 1.2E-15            | 5.38E-13                     |
| 159 | <i>FANCG</i> | ASJ              | 0                                                           | EAS              | 9.14E-04                                                    | 0.057              | 1                            |
| 160 | <i>FANCG</i> | ASJ              | 0                                                           | FIN              | 3.75E-04                                                    | 0.319              | 1                            |



| No. | Gene         | Ancestry group 1 | Cohort size-normalized carrier frequency (Ancestry group 1) | Ancestry group 2 | Cohort size-normalized carrier frequency (Ancestry group 2) | Unadjusted p-value | Bonferroni-corrected p-value |
|-----|--------------|------------------|-------------------------------------------------------------|------------------|-------------------------------------------------------------|--------------------|------------------------------|
| 161 | <i>FANCG</i> | ASJ              | 0                                                           | NFE              | 1.66E-03                                                    | 0.001              | 0.547                        |
| 162 | <i>FANCG</i> | ASJ              | 0                                                           | SAS              | 5.64E-03                                                    | 1E-10              | 4.48E-08                     |
| 163 | <i>FANCG</i> | EAS              | 9.14E-04                                                    | FIN              | 3.75E-04                                                    | 0.154              | 1                            |
| 164 | <i>FANCG</i> | EAS              | 9.14E-04                                                    | NFE              | 1.66E-03                                                    | 0.107              | 1                            |
| 165 | <i>FANCG</i> | EAS              | 9.14E-04                                                    | SAS              | 5.64E-03                                                    | 7.9E-10            | 3.54E-07                     |
| 166 | <i>FANCG</i> | FIN              | 3.75E-04                                                    | NFE              | 1.66E-03                                                    | 5.80E-04           | 0.260                        |
| 167 | <i>FANCG</i> | FIN              | 3.75E-04                                                    | SAS              | 5.64E-03                                                    | 1.9E-15            | 8.51E-13                     |
| 168 | <i>FANCG</i> | NFE              | 1.66E-03                                                    | SAS              | 5.64E-03                                                    | 9.7E-15            | 4.35E-12                     |
| 169 | <i>FANCI</i> | SG               | 5.68E-04                                                    | AFR              | 3.41E-03                                                    | 0.003              | 1                            |
| 170 | <i>FANCI</i> | SG               | 5.68E-04                                                    | AMR              | 4.02E-03                                                    | 3.70E-04           | 0.166                        |
| 171 | <i>FANCI</i> | SG               | 5.68E-04                                                    | ASJ              | 4.22E-04                                                    | 1                  | 1                            |
| 172 | <i>FANCI</i> | SG               | 5.68E-04                                                    | EAS              | 2.06E-03                                                    | 0.082              | 1                            |
| 173 | <i>FANCI</i> | SG               | 5.68E-04                                                    | FIN              | 9.10E-03                                                    | 4.9E-10            | 2.20E-07                     |
| 174 | <i>FANCI</i> | SG               | 5.68E-04                                                    | NFE              | 3.32E-03                                                    | 1.58E-03           | 0.708                        |
| 175 | <i>FANCI</i> | SG               | 5.68E-04                                                    | SAS              | 2.99E-03                                                    | 0.008              | 1                            |
| 176 | <i>FANCI</i> | AFR              | 3.41E-03                                                    | AMR              | 4.02E-03                                                    | 0.572              | 1                            |
| 177 | <i>FANCI</i> | AFR              | 3.41E-03                                                    | ASJ              | 4.22E-04                                                    | 4.90E-04           | 0.220                        |
| 178 | <i>FANCI</i> | AFR              | 3.41E-03                                                    | EAS              | 2.06E-03                                                    | 0.124              | 1                            |
| 179 | <i>FANCI</i> | AFR              | 3.41E-03                                                    | FIN              | 9.10E-03                                                    | 2.80E-06           | 1.25E-03                     |
| 180 | <i>FANCI</i> | AFR              | 3.41E-03                                                    | NFE              | 3.32E-03                                                    | 0.913              | 1                            |
| 181 | <i>FANCI</i> | AFR              | 3.41E-03                                                    | SAS              | 2.99E-03                                                    | 0.611              | 1                            |
| 182 | <i>FANCI</i> | AMR              | 4.02E-03                                                    | ASJ              | 4.22E-04                                                    | 1.40E-05           | 6.27E-03                     |
| 183 | <i>FANCI</i> | AMR              | 4.02E-03                                                    | EAS              | 2.06E-03                                                    | 0.009              | 1                            |
| 184 | <i>FANCI</i> | AMR              | 4.02E-03                                                    | FIN              | 9.10E-03                                                    | 2.00E-07           | 8.96E-05                     |
| 185 | <i>FANCI</i> | AMR              | 4.02E-03                                                    | NFE              | 3.32E-03                                                    | 0.176              | 1                            |
| 186 | <i>FANCI</i> | AMR              | 4.02E-03                                                    | SAS              | 2.99E-03                                                    | 0.131              | 1                            |
| 187 | <i>FANCI</i> | ASJ              | 4.22E-04                                                    | EAS              | 2.06E-03                                                    | 0.018              | 1                            |

| No. | Gene         | Ancestry group 1 | Cohort size-normalized carrier frequency (Ancestry group 1) | Ancestry group 2 | Cohort size-normalized carrier frequency (Ancestry group 2) | Unadjusted p-value | Bonferroni-corrected p-value |
|-----|--------------|------------------|-------------------------------------------------------------|------------------|-------------------------------------------------------------|--------------------|------------------------------|
| 188 | <i>FANCI</i> | ASJ              | 4.22E-04                                                    | FIN              | 9.10E-03                                                    | 1.80E-13           | 8.06E-11                     |
| 189 | <i>FANCI</i> | ASJ              | 4.22E-04                                                    | NFE              | 3.32E-03                                                    | 8.20E-05           | 0.037                        |
| 190 | <i>FANCI</i> | ASJ              | 4.22E-04                                                    | SAS              | 2.99E-03                                                    | 4.80E-04           | 0.215                        |
| 191 | <i>FANCI</i> | EAS              | 2.06E-03                                                    | FIN              | 9.10E-03                                                    | 2.40E-11           | 1.08E-08                     |
| 192 | <i>FANCI</i> | EAS              | 2.06E-03                                                    | NFE              | 3.32E-03                                                    | 0.049              | 1                            |
| 193 | <i>FANCI</i> | EAS              | 2.06E-03                                                    | SAS              | 2.99E-03                                                    | 0.193              | 1                            |
| 194 | <i>FANCI</i> | FIN              | 9.10E-03                                                    | NFE              | 3.32E-03                                                    | 9.70E-14           | 4.35E-11                     |
| 195 | <i>FANCI</i> | FIN              | 9.10E-03                                                    | SAS              | 2.99E-03                                                    | 1.00E-10           | 4.48E-08                     |
| 196 | <i>FANCI</i> | NFE              | 3.32E-03                                                    | SAS              | 2.99E-03                                                    | 0.568              | 1                            |
| 197 | <i>FANCL</i> | SG               | 5.68E-04                                                    | AFR              | 3.28E-03                                                    | 0.005              | 1                            |
| 198 | <i>FANCL</i> | SG               | 5.68E-04                                                    | AMR              | 1.22E-02                                                    | 1.40E-14           | 6.27E-12                     |
| 199 | <i>FANCL</i> | SG               | 5.68E-04                                                    | ASJ              | 1.44E-02                                                    | 2.50E-14           | 1.12E-11                     |
| 200 | <i>FANCL</i> | SG               | 5.68E-04                                                    | EAS              | 8.00E-04                                                    | 1                  | 1                            |
| 201 | <i>FANCL</i> | SG               | 5.68E-04                                                    | FIN              | 3.66E-03                                                    | 0.002              | 0.726                        |
| 202 | <i>FANCL</i> | SG               | 5.68E-04                                                    | NFE              | 7.84E-03                                                    | 1.40E-09           | 6.27E-07                     |
| 203 | <i>FANCL</i> | SG               | 5.68E-04                                                    | SAS              | 2.65E-03                                                    | 0.016              | 1                            |
| 204 | <i>FANCL</i> | AFR              | 3.28E-03                                                    | AMR              | 1.22E-02                                                    | 9.10E-13           | 4.08E-10                     |
| 205 | <i>FANCL</i> | AFR              | 3.28E-03                                                    | ASJ              | 1.44E-02                                                    | 1.90E-11           | 8.51E-09                     |
| 206 | <i>FANCL</i> | AFR              | 3.28E-03                                                    | EAS              | 8.00E-04                                                    | 4.20E-04           | 0.188                        |
| 207 | <i>FANCL</i> | AFR              | 3.28E-03                                                    | FIN              | 3.66E-03                                                    | 0.702              | 1                            |
| 208 | <i>FANCL</i> | AFR              | 3.28E-03                                                    | NFE              | 7.84E-03                                                    | 3.00E-06           | 1.34E-03                     |
| 209 | <i>FANCL</i> | AFR              | 3.28E-03                                                    | SAS              | 2.65E-03                                                    | 0.425              | 1                            |
| 210 | <i>FANCL</i> | AMR              | 1.22E-02                                                    | ASJ              | 1.44E-02                                                    | 0.240              | 1                            |
| 211 | <i>FANCL</i> | AMR              | 1.22E-02                                                    | EAS              | 8.00E-04                                                    | <2.00E-16          | <9.00E-14                    |
| 212 | <i>FANCL</i> | AMR              | 1.22E-02                                                    | FIN              | 3.66E-03                                                    | 9.90E-15           | 4.44E-12                     |
| 213 | <i>FANCL</i> | AMR              | 1.22E-02                                                    | NFE              | 7.84E-03                                                    | 5.10E-07           | 2.28E-04                     |
| 214 | <i>FANCL</i> | AMR              | 1.22E-02                                                    | SAS              | 2.65E-03                                                    | <2.00E-16          | <9.00E-14                    |

| No. | Gene         | Ancestry group 1 | Cohort size-normalized carrier frequency (Ancestry group 1) | Ancestry group 2 | Cohort size-normalized carrier frequency (Ancestry group 2) | Unadjusted p-value | Bonferroni-corrected p-value |
|-----|--------------|------------------|-------------------------------------------------------------|------------------|-------------------------------------------------------------|--------------------|------------------------------|
| 215 | <i>FANCL</i> | ASJ              | 1.44E-02                                                    | EAS              | 8.00E-04                                                    | <2.00E-16          | <9.00E-14                    |
| 216 | <i>FANCL</i> | ASJ              | 1.44E-02                                                    | FIN              | 3.66E-03                                                    | 4.00E-12           | 1.79E-09                     |
| 217 | <i>FANCL</i> | ASJ              | 1.44E-02                                                    | NFE              | 7.84E-03                                                    | 1.80E-05           | 8.06E-03                     |
| 218 | <i>FANCL</i> | ASJ              | 1.44E-02                                                    | SAS              | 2.65E-03                                                    | <2.00E-16          | <9.00E-14                    |
| 219 | <i>FANCL</i> | EAS              | 8.00E-04                                                    | FIN              | 3.66E-03                                                    | 3.60E-05           | 1.61E-02                     |
| 220 | <i>FANCL</i> | EAS              | 8.00E-04                                                    | NFE              | 7.84E-03                                                    | <2.00E-16          | <9.00E-14                    |
| 221 | <i>FANCL</i> | EAS              | 8.00E-04                                                    | SAS              | 2.65E-03                                                    | 0.001              | 0.582                        |
| 222 | <i>FANCL</i> | FIN              | 3.66E-03                                                    | NFE              | 7.84E-03                                                    | 6.40E-07           | 2.87E-04                     |
| 223 | <i>FANCL</i> | FIN              | 3.66E-03                                                    | SAS              | 2.65E-03                                                    | 0.170              | 1                            |
| 224 | <i>FANCL</i> | NFE              | 7.84E-03                                                    | SAS              | 2.65E-03                                                    | 5.50E-14           | 2.46E-11                     |
| 225 | <i>FANCM</i> | SG               | 1.99E-03                                                    | AFR              | 2.73E-03                                                    | 0.542              | 1                            |
| 226 | <i>FANCM</i> | SG               | 1.99E-03                                                    | AMR              | 2.84E-03                                                    | 0.475              | 1                            |
| 227 | <i>FANCM</i> | SG               | 1.99E-03                                                    | ASJ              | 0                                                           | 0.003              | 1                            |
| 228 | <i>FANCM</i> | SG               | 1.99E-03                                                    | EAS              | 1.71E-03                                                    | 0.814              | 1                            |
| 229 | <i>FANCM</i> | SG               | 1.99E-03                                                    | FIN              | 2.70E-02                                                    | <2.00E-16          | <9.00E-14                    |
| 230 | <i>FANCM</i> | SG               | 1.99E-03                                                    | NFE              | 7.11E-03                                                    | 6.90E-05           | 0.031                        |
| 231 | <i>FANCM</i> | SG               | 1.99E-03                                                    | SAS              | 6.31E-03                                                    | 8.70E-04           | 0.390                        |
| 232 | <i>FANCM</i> | AFR              | 2.73E-03                                                    | AMR              | 2.84E-03                                                    | 1                  | 1                            |
| 233 | <i>FANCM</i> | AFR              | 2.73E-03                                                    | ASJ              | 0                                                           | 8.10E-05           | 0.036                        |
| 234 | <i>FANCM</i> | AFR              | 2.73E-03                                                    | EAS              | 1.71E-03                                                    | 0.178              | 1                            |
| 235 | <i>FANCM</i> | AFR              | 2.73E-03                                                    | FIN              | 2.70E-02                                                    | <2.00E-16          | <9.00E-14                    |
| 236 | <i>FANCM</i> | AFR              | 2.73E-03                                                    | NFE              | 7.11E-03                                                    | 2.70E-06           | 1.21E-03                     |
| 237 | <i>FANCM</i> | AFR              | 2.73E-03                                                    | SAS              | 6.31E-03                                                    | 3.00E-04           | 0.134                        |
| 238 | <i>FANCM</i> | AMR              | 2.84E-03                                                    | ASJ              | 0                                                           | 1.10E-05           | 4.93E-03                     |
| 239 | <i>FANCM</i> | AMR              | 2.84E-03                                                    | EAS              | 1.71E-03                                                    | 0.109              | 1                            |
| 240 | <i>FANCM</i> | AMR              | 2.84E-03                                                    | FIN              | 2.70E-02                                                    | <2.00E-16          | <9.00E-14                    |
| 241 | <i>FANCM</i> | AMR              | 2.84E-03                                                    | NFE              | 7.11E-03                                                    | 2.70E-11           | 1.21E-08                     |

| No. | Gene         | Ancestry group 1 | Cohort size-normalized carrier frequency (Ancestry group 1) | Ancestry group 2 | Cohort size-normalized carrier frequency (Ancestry group 2) | Unadjusted p-value | Bonferroni-corrected p-value |
|-----|--------------|------------------|-------------------------------------------------------------|------------------|-------------------------------------------------------------|--------------------|------------------------------|
| 242 | <i>FANCM</i> | AMR              | 2.84E-03                                                    | SAS              | 6.31E-03                                                    | 4.50E-06           | 2.02E-03                     |
| 243 | <i>FANCM</i> | ASJ              | 0                                                           | EAS              | 1.71E-03                                                    | 0.002              | 0.896                        |
| 244 | <i>FANCM</i> | ASJ              | 0                                                           | FIN              | 2.70E-02                                                    | <2.00E-16          | <9.00E-14                    |
| 245 | <i>FANCM</i> | ASJ              | 0                                                           | NFE              | 7.11E-03                                                    | 1.50E-14           | 6.72E-12                     |
| 246 | <i>FANCM</i> | ASJ              | 0                                                           | SAS              | 6.31E-03                                                    | 1.10E-11           | 4.93E-09                     |
| 247 | <i>FANCM</i> | EAS              | 1.71E-03                                                    | FIN              | 2.70E-02                                                    | <2.00E-16          | <9.00E-14                    |
| 248 | <i>FANCM</i> | EAS              | 1.71E-03                                                    | NFE              | 7.11E-03                                                    | 2.20E-11           | 9.86E-09                     |
| 249 | <i>FANCM</i> | EAS              | 1.71E-03                                                    | SAS              | 6.31E-03                                                    | 8.50E-08           | 3.81E-05                     |
| 250 | <i>FANCM</i> | FIN              | 2.70E-02                                                    | NFE              | 7.11E-03                                                    | <2.00E-16          | <9.00E-14                    |
| 251 | <i>FANCM</i> | FIN              | 2.70E-02                                                    | SAS              | 6.31E-03                                                    | <2.00E-16          | <9.00E-14                    |
| 252 | <i>FANCM</i> | NFE              | 7.11E-03                                                    | SAS              | 6.31E-03                                                    | 0.314              | 1                            |
| 253 | <i>SLX4</i>  | SG               | 8.52E-04                                                    | AFR              | 4.10E-04                                                    | 0.397              | 1                            |
| 254 | <i>SLX4</i>  | SG               | 8.52E-04                                                    | AMR              | 1.18E-03                                                    | 0.785              | 1                            |
| 255 | <i>SLX4</i>  | SG               | 8.52E-04                                                    | ASJ              | 0                                                           | 0.078              | 1                            |
| 256 | <i>SLX4</i>  | SG               | 8.52E-04                                                    | EAS              | 2.86E-03                                                    | 0.036              | 1                            |
| 257 | <i>SLX4</i>  | SG               | 8.52E-04                                                    | FIN              | 5.63E-04                                                    | 0.699              | 1                            |
| 258 | <i>SLX4</i>  | SG               | 8.52E-04                                                    | NFE              | 1.52E-03                                                    | 0.494              | 1                            |
| 259 | <i>SLX4</i>  | SG               | 8.52E-04                                                    | SAS              | 1.86E-03                                                    | 0.252              | 1                            |
| 260 | <i>SLX4</i>  | AFR              | 4.10E-04                                                    | AMR              | 1.18E-03                                                    | 0.109              | 1                            |
| 261 | <i>SLX4</i>  | AFR              | 4.10E-04                                                    | ASJ              | 0                                                           | 0.284              | 1                            |
| 262 | <i>SLX4</i>  | AFR              | 4.10E-04                                                    | EAS              | 2.86E-03                                                    | 1.70E-04           | 0.076                        |
| 263 | <i>SLX4</i>  | AFR              | 4.10E-04                                                    | FIN              | 5.63E-04                                                    | 0.746              | 1                            |
| 264 | <i>SLX4</i>  | AFR              | 4.10E-04                                                    | NFE              | 1.52E-03                                                    | 0.011              | 1                            |
| 265 | <i>SLX4</i>  | AFR              | 4.10E-04                                                    | SAS              | 1.86E-03                                                    | 0.006              | 1                            |
| 266 | <i>SLX4</i>  | AMR              | 1.18E-03                                                    | ASJ              | 0                                                           | 0.012              | 1                            |
| 267 | <i>SLX4</i>  | AMR              | 1.18E-03                                                    | EAS              | 2.86E-03                                                    | 0.004              | 1                            |
| 268 | <i>SLX4</i>  | AMR              | 1.18E-03                                                    | FIN              | 5.63E-04                                                    | 0.111              | 1                            |

| No. | Gene         | Ancestry group 1 | Cohort size-normalized carrier frequency (Ancestry group 1) | Ancestry group 2 | Cohort size-normalized carrier frequency (Ancestry group 2) | Unadjusted p-value | Bonferroni-corrected p-value |
|-----|--------------|------------------|-------------------------------------------------------------|------------------|-------------------------------------------------------------|--------------------|------------------------------|
| 269 | <i>SLX4</i>  | AMR              | 1.18E-03                                                    | NFE              | 1.52E-03                                                    | 0.350              | 1                            |
| 270 | <i>SLX4</i>  | AMR              | 1.18E-03                                                    | SAS              | 1.86E-03                                                    | 0.147              | 1                            |
| 271 | <i>SLX4</i>  | ASJ              | 0                                                           | EAS              | 2.86E-03                                                    | 2.50E-05           | 1.12E-02                     |
| 272 | <i>SLX4</i>  | ASJ              | 0                                                           | FIN              | 5.63E-04                                                    | 0.187              | 1                            |
| 273 | <i>SLX4</i>  | ASJ              | 0                                                           | NFE              | 1.52E-03                                                    | 0.002              | 0.784                        |
| 274 | <i>SLX4</i>  | ASJ              | 0                                                           | SAS              | 1.86E-03                                                    | 6.40E-04           | 0.287                        |
| 275 | <i>SLX4</i>  | EAS              | 2.86E-03                                                    | FIN              | 5.63E-04                                                    | 7.80E-05           | 0.035                        |
| 276 | <i>SLX4</i>  | EAS              | 2.86E-03                                                    | NFE              | 1.52E-03                                                    | 0.011              | 1                            |
| 277 | <i>SLX4</i>  | EAS              | 2.86E-03                                                    | SAS              | 1.86E-03                                                    | 0.119              | 1                            |
| 278 | <i>SLX4</i>  | FIN              | 5.63E-04                                                    | NFE              | 1.52E-03                                                    | 0.009              | 1                            |
| 279 | <i>SLX4</i>  | FIN              | 5.63E-04                                                    | SAS              | 1.86E-03                                                    | 0.005              | 1                            |
| 280 | <i>SLX4</i>  | NFE              | 1.52E-03                                                    | SAS              | 1.86E-03                                                    | 0.418              | 1                            |
| 281 | <i>ERCC4</i> | SG               | 5.68E-04                                                    | AFR              | 1.91E-03                                                    | 0.110              | 1                            |
| 282 | <i>ERCC4</i> | SG               | 5.68E-04                                                    | AMR              | 1.48E-03                                                    | 0.303              | 1                            |
| 283 | <i>ERCC4</i> | SG               | 5.68E-04                                                    | ASJ              | 6.33E-04                                                    | 1                  | 1                            |
| 284 | <i>ERCC4</i> | SG               | 5.68E-04                                                    | EAS              | 2.17E-03                                                    | 0.036              | 1                            |
| 285 | <i>ERCC4</i> | SG               | 5.68E-04                                                    | FIN              | 6.56E-04                                                    | 1                  | 1                            |
| 286 | <i>ERCC4</i> | SG               | 5.68E-04                                                    | NFE              | 2.07E-03                                                    | 0.048              | 1                            |
| 287 | <i>ERCC4</i> | SG               | 5.68E-04                                                    | SAS              | 3.52E-03                                                    | 0.002              | 0.708                        |
| 288 | <i>ERCC4</i> | AFR              | 1.91E-03                                                    | AMR              | 1.48E-03                                                    | 0.485              | 1                            |
| 289 | <i>ERCC4</i> | AFR              | 1.91E-03                                                    | ASJ              | 6.33E-04                                                    | 0.083              | 1                            |
| 290 | <i>ERCC4</i> | AFR              | 1.91E-03                                                    | EAS              | 2.17E-03                                                    | 0.611              | 1                            |
| 291 | <i>ERCC4</i> | AFR              | 1.91E-03                                                    | FIN              | 6.56E-04                                                    | 0.024              | 1                            |
| 292 | <i>ERCC4</i> | AFR              | 1.91E-03                                                    | NFE              | 2.07E-03                                                    | 0.890              | 1                            |
| 293 | <i>ERCC4</i> | AFR              | 1.91E-03                                                    | SAS              | 3.52E-03                                                    | 0.049              | 1                            |
| 294 | <i>ERCC4</i> | AMR              | 1.48E-03                                                    | ASJ              | 6.33E-04                                                    | 0.176              | 1                            |
| 295 | <i>ERCC4</i> | AMR              | 1.48E-03                                                    | EAS              | 2.17E-03                                                    | 0.119              | 1                            |

| No. | Gene         | Ancestry group 1 | Cohort size-normalized carrier frequency (Ancestry group 1) | Ancestry group 2 | Cohort size-normalized carrier frequency (Ancestry group 2) | Unadjusted p-value | Bonferroni-corrected p-value |
|-----|--------------|------------------|-------------------------------------------------------------|------------------|-------------------------------------------------------------|--------------------|------------------------------|
| 296 | <i>ERCC4</i> | AMR              | 1.48E-03                                                    | FIN              | 6.56E-04                                                    | 0.068              | 1                            |
| 297 | <i>ERCC4</i> | AMR              | 1.48E-03                                                    | NFE              | 2.07E-03                                                    | 0.155              | 1                            |
| 298 | <i>ERCC4</i> | AMR              | 1.48E-03                                                    | SAS              | 3.52E-03                                                    | 2.40E-04           | 0.108                        |
| 299 | <i>ERCC4</i> | ASJ              | 6.33E-04                                                    | EAS              | 2.17E-03                                                    | 0.018              | 1                            |
| 300 | <i>ERCC4</i> | ASJ              | 6.33E-04                                                    | FIN              | 6.56E-04                                                    | 1                  | 1                            |
| 301 | <i>ERCC4</i> | ASJ              | 6.33E-04                                                    | NFE              | 2.07E-03                                                    | 0.025              | 1                            |
| 302 | <i>ERCC4</i> | ASJ              | 6.33E-04                                                    | SAS              | 3.52E-03                                                    | 4.20E-04           | 0.188                        |
| 303 | <i>ERCC4</i> | EAS              | 2.17E-03                                                    | FIN              | 6.56E-04                                                    | 0.002              | 0.829                        |
| 304 | <i>ERCC4</i> | EAS              | 2.17E-03                                                    | NFE              | 2.07E-03                                                    | 0.529              | 1                            |
| 305 | <i>ERCC4</i> | EAS              | 2.17E-03                                                    | SAS              | 3.52E-03                                                    | 0.148              | 1                            |
| 306 | <i>ERCC4</i> | FIN              | 6.56E-04                                                    | NFE              | 2.07E-03                                                    | 0.001              | 0.452                        |
| 307 | <i>ERCC4</i> | FIN              | 6.56E-04                                                    | SAS              | 3.52E-03                                                    | 5.90E-07           | 2.64E-04                     |
| 308 | <i>ERCC4</i> | NFE              | 2.07E-03                                                    | SAS              | 3.52E-03                                                    | 0.002              | 1                            |
| 309 | <i>RAD51</i> | SG               | 2.84E-04                                                    | AFR              | 2.32E-03                                                    | 0.011              | 1                            |
| 310 | <i>RAD51</i> | SG               | 2.84E-04                                                    | AMR              | 5.91E-05                                                    | 0.315              | 1                            |
| 311 | <i>RAD51</i> | SG               | 2.84E-04                                                    | ASJ              | 0                                                           | 0.426              | 1                            |
| 312 | <i>RAD51</i> | SG               | 2.84E-04                                                    | EAS              | 1.14E-04                                                    | 0.492              | 1                            |
| 313 | <i>RAD51</i> | SG               | 2.84E-04                                                    | FIN              | 9.38E-05                                                    | 0.435              | 1                            |
| 314 | <i>RAD51</i> | SG               | 2.84E-04                                                    | NFE              | 3.95E-05                                                    | 0.236              | 1                            |
| 315 | <i>RAD51</i> | SG               | 2.84E-04                                                    | SAS              | 1.99E-04                                                    | 1                  | 1                            |
| 316 | <i>RAD51</i> | AFR              | 2.32E-03                                                    | AMR              | 5.91E-05                                                    | 1.90E-08           | 8.51E-06                     |
| 317 | <i>RAD51</i> | AFR              | 2.32E-03                                                    | ASJ              | 0                                                           | 2.50E-04           | 0.112                        |
| 318 | <i>RAD51</i> | AFR              | 2.32E-03                                                    | EAS              | 1.14E-04                                                    | 1.60E-05           | 7.17E-03                     |
| 319 | <i>RAD51</i> | AFR              | 2.32E-03                                                    | FIN              | 9.38E-05                                                    | 2.60E-06           | 1.16E-03                     |
| 320 | <i>RAD51</i> | AFR              | 2.32E-03                                                    | NFE              | 3.95E-05                                                    | 4.10E-13           | 1.84E-10                     |
| 321 | <i>RAD51</i> | AFR              | 2.32E-03                                                    | SAS              | 1.99E-04                                                    | 7.60E-06           | 3.40E-03                     |
| 322 | <i>RAD51</i> | AMR              | 5.91E-05                                                    | ASJ              | 0                                                           | 1                  | 1                            |

| No. | Gene         | Ancestry group 1 | Cohort size-normalized carrier frequency (Ancestry group 1) | Ancestry group 2 | Cohort size-normalized carrier frequency (Ancestry group 2) | Unadjusted p-value | Bonferroni-corrected p-value |
|-----|--------------|------------------|-------------------------------------------------------------|------------------|-------------------------------------------------------------|--------------------|------------------------------|
| 323 | <i>RAD51</i> | AMR              | 5.91E-05                                                    | EAS              | 1.14E-04                                                    | 1                  | 1                            |
| 324 | <i>RAD51</i> | AMR              | 5.91E-05                                                    | FIN              | 9.38E-05                                                    | 1                  | 1                            |
| 325 | <i>RAD51</i> | AMR              | 5.91E-05                                                    | NFE              | 3.95E-05                                                    | 1                  | 1                            |
| 326 | <i>RAD51</i> | AMR              | 5.91E-05                                                    | SAS              | 1.99E-04                                                    | 0.195              | 1                            |
| 327 | <i>RAD51</i> | ASJ              | 0                                                           | EAS              | 1.14E-04                                                    | 1                  | 1                            |
| 328 | <i>RAD51</i> | ASJ              | 0                                                           | FIN              | 9.38E-05                                                    | 1                  | 1                            |
| 329 | <i>RAD51</i> | ASJ              | 0                                                           | NFE              | 3.95E-05                                                    | 1                  | 1                            |
| 330 | <i>RAD51</i> | ASJ              | 0                                                           | SAS              | 1.99E-04                                                    | 0.579              | 1                            |
| 331 | <i>RAD51</i> | EAS              | 1.14E-04                                                    | FIN              | 9.38E-05                                                    | 1                  | 1                            |
| 332 | <i>RAD51</i> | EAS              | 1.14E-04                                                    | NFE              | 3.95E-05                                                    | 0.472              | 1                            |
| 333 | <i>RAD51</i> | EAS              | 1.14E-04                                                    | SAS              | 1.99E-04                                                    | 0.658              | 1                            |
| 334 | <i>RAD51</i> | FIN              | 9.38E-05                                                    | NFE              | 3.95E-05                                                    | 0.535              | 1                            |
| 335 | <i>RAD51</i> | FIN              | 9.38E-05                                                    | SAS              | 1.99E-04                                                    | 0.411              | 1                            |
| 336 | <i>RAD51</i> | NFE              | 3.95E-05                                                    | SAS              | 1.99E-04                                                    | 0.053              | 1                            |
| 337 | <i>UBE2T</i> | SG               | 8.52E-04                                                    | AFR              | 6.83E-04                                                    | 0.720              | 1                            |
| 338 | <i>UBE2T</i> | SG               | 8.52E-04                                                    | AMR              | 4.73E-04                                                    | 0.416              | 1                            |
| 339 | <i>UBE2T</i> | SG               | 8.52E-04                                                    | ASJ              | 0                                                           | 0.078              | 1                            |
| 340 | <i>UBE2T</i> | SG               | 8.52E-04                                                    | EAS              | 8.00E-04                                                    | 1                  | 1                            |
| 341 | <i>UBE2T</i> | SG               | 8.52E-04                                                    | FIN              | 9.38E-05                                                    | 0.050              | 1                            |
| 342 | <i>UBE2T</i> | SG               | 8.52E-04                                                    | NFE              | 2.17E-04                                                    | 0.058              | 1                            |
| 343 | <i>UBE2T</i> | SG               | 8.52E-04                                                    | SAS              | 1.99E-04                                                    | 0.086              | 1                            |
| 344 | <i>UBE2T</i> | AFR              | 6.83E-04                                                    | AMR              | 4.73E-04                                                    | 0.550              | 1                            |
| 345 | <i>UBE2T</i> | AFR              | 6.83E-04                                                    | ASJ              | 0                                                           | 0.164              | 1                            |
| 346 | <i>UBE2T</i> | AFR              | 6.83E-04                                                    | EAS              | 8.00E-04                                                    | 1                  | 1                            |
| 347 | <i>UBE2T</i> | AFR              | 6.83E-04                                                    | FIN              | 9.38E-05                                                    | 0.044              | 1                            |
| 348 | <i>UBE2T</i> | AFR              | 6.83E-04                                                    | NFE              | 2.17E-04                                                    | 0.042              | 1                            |
| 349 | <i>UBE2T</i> | AFR              | 6.83E-04                                                    | SAS              | 1.99E-04                                                    | 0.124              | 1                            |

| No. | Gene         | Ancestry group 1 | Cohort size-normalized carrier frequency (Ancestry group 1) | Ancestry group 2 | Cohort size-normalized carrier frequency (Ancestry group 2) | Unadjusted p-value | Bonferroni-corrected p-value |
|-----|--------------|------------------|-------------------------------------------------------------|------------------|-------------------------------------------------------------|--------------------|------------------------------|
| 350 | <i>UBE2T</i> | AMR              | 4.73E-04                                                    | ASJ              | 0                                                           | 0.214              | 1                            |
| 351 | <i>UBE2T</i> | AMR              | 4.73E-04                                                    | EAS              | 8.00E-04                                                    | 0.414              | 1                            |
| 352 | <i>UBE2T</i> | AMR              | 4.73E-04                                                    | FIN              | 9.38E-05                                                    | 0.167              | 1                            |
| 353 | <i>UBE2T</i> | AMR              | 4.73E-04                                                    | NFE              | 2.17E-04                                                    | 0.109              | 1                            |
| 354 | <i>UBE2T</i> | AMR              | 4.73E-04                                                    | SAS              | 1.99E-04                                                    | 0.235              | 1                            |
| 355 | <i>UBE2T</i> | ASJ              | 0                                                           | EAS              | 8.00E-04                                                    | 0.105              | 1                            |
| 356 | <i>UBE2T</i> | ASJ              | 0                                                           | FIN              | 9.38E-05                                                    | 1                  | 1                            |
| 357 | <i>UBE2T</i> | ASJ              | 0                                                           | NFE              | 2.17E-04                                                    | 0.615              | 1                            |
| 358 | <i>UBE2T</i> | ASJ              | 0                                                           | SAS              | 1.99E-04                                                    | 1                  | 1                            |
| 359 | <i>UBE2T</i> | EAS              | 8.00E-04                                                    | FIN              | 9.38E-05                                                    | 0.027              | 1                            |
| 360 | <i>UBE2T</i> | EAS              | 8.00E-04                                                    | NFE              | 2.17E-04                                                    | 0.011              | 1                            |
| 361 | <i>UBE2T</i> | EAS              | 8.00E-04                                                    | SAS              | 1.99E-04                                                    | 0.044              | 1                            |
| 362 | <i>UBE2T</i> | FIN              | 9.38E-05                                                    | NFE              | 2.17E-04                                                    | 0.705              | 1                            |
| 363 | <i>UBE2T</i> | FIN              | 9.38E-05                                                    | SAS              | 1.99E-04                                                    | 0.647              | 1                            |
| 364 | <i>UBE2T</i> | NFE              | 2.17E-04                                                    | SAS              | 1.99E-04                                                    | 1                  | 1                            |
| 365 | <i>XRCC2</i> | SG               | 1.14E-03                                                    | AFR              | 2.73E-04                                                    | 0.092              | 1                            |
| 366 | <i>XRCC2</i> | SG               | 1.14E-03                                                    | AMR              | 1.36E-03                                                    | 1                  | 1                            |
| 367 | <i>XRCC2</i> | SG               | 1.14E-03                                                    | ASJ              | 8.44E-04                                                    | 0.730              | 1                            |
| 368 | <i>XRCC2</i> | SG               | 1.14E-03                                                    | EAS              | 1.14E-04                                                    | 0.026              | 1                            |
| 369 | <i>XRCC2</i> | SG               | 1.14E-03                                                    | FIN              | 5.63E-04                                                    | 0.278              | 1                            |
| 370 | <i>XRCC2</i> | SG               | 1.14E-03                                                    | NFE              | 1.21E-03                                                    | 1                  | 1                            |
| 371 | <i>XRCC2</i> | SG               | 1.14E-03                                                    | SAS              | 5.31E-04                                                    | 0.259              | 1                            |
| 372 | <i>XRCC2</i> | AFR              | 2.73E-04                                                    | AMR              | 1.36E-03                                                    | 0.015              | 1                            |
| 373 | <i>XRCC2</i> | AFR              | 2.73E-04                                                    | ASJ              | 8.44E-04                                                    | 0.219              | 1                            |
| 374 | <i>XRCC2</i> | AFR              | 2.73E-04                                                    | EAS              | 1.14E-04                                                    | 0.595              | 1                            |
| 375 | <i>XRCC2</i> | AFR              | 2.73E-04                                                    | FIN              | 5.63E-04                                                    | 0.485              | 1                            |
| 376 | <i>XRCC2</i> | AFR              | 2.73E-04                                                    | NFE              | 1.21E-03                                                    | 0.021              | 1                            |



| No. | Gene          | Ancestry group 1 | Cohort size-normalized carrier frequency (Ancestry group 1) | Ancestry group 2 | Cohort size-normalized carrier frequency (Ancestry group 2) | Unadjusted p-value | Bonferroni-corrected p-value |
|-----|---------------|------------------|-------------------------------------------------------------|------------------|-------------------------------------------------------------|--------------------|------------------------------|
| 377 | <i>XRCC2</i>  | AFR              | 2.73E-04                                                    | SAS              | 5.31E-04                                                    | 0.514              | 1                            |
| 378 | <i>XRCC2</i>  | AMR              | 1.36E-03                                                    | ASJ              | 8.44E-04                                                    | 0.488              | 1                            |
| 379 | <i>XRCC2</i>  | AMR              | 1.36E-03                                                    | EAS              | 1.14E-04                                                    | 8.60E-04           | 0.385                        |
| 380 | <i>XRCC2</i>  | AMR              | 1.36E-03                                                    | FIN              | 5.63E-04                                                    | 0.056              | 1                            |
| 381 | <i>XRCC2</i>  | AMR              | 1.36E-03                                                    | NFE              | 1.21E-03                                                    | 0.615              | 1                            |
| 382 | <i>XRCC2</i>  | AMR              | 1.36E-03                                                    | SAS              | 5.31E-04                                                    | 0.019              | 1                            |
| 383 | <i>XRCC2</i>  | ASJ              | 8.44E-04                                                    | EAS              | 1.14E-04                                                    | 0.055              | 1                            |
| 384 | <i>XRCC2</i>  | ASJ              | 8.44E-04                                                    | FIN              | 5.63E-04                                                    | 0.509              | 1                            |
| 385 | <i>XRCC2</i>  | ASJ              | 8.44E-04                                                    | NFE              | 1.21E-03                                                    | 0.657              | 1                            |
| 386 | <i>XRCC2</i>  | ASJ              | 8.44E-04                                                    | SAS              | 5.31E-04                                                    | 0.497              | 1                            |
| 387 | <i>XRCC2</i>  | EAS              | 1.14E-04                                                    | FIN              | 5.63E-04                                                    | 0.138              | 1                            |
| 388 | <i>XRCC2</i>  | EAS              | 1.14E-04                                                    | NFE              | 1.21E-03                                                    | 9.90E-04           | 0.444                        |
| 389 | <i>XRCC2</i>  | EAS              | 1.14E-04                                                    | SAS              | 5.31E-04                                                    | 0.168              | 1                            |
| 390 | <i>XRCC2</i>  | FIN              | 5.63E-04                                                    | NFE              | 1.21E-03                                                    | 0.075              | 1                            |
| 391 | <i>XRCC2</i>  | FIN              | 5.63E-04                                                    | SAS              | 5.31E-04                                                    | 1                  | 1                            |
| 392 | <i>XRCC2</i>  | NFE              | 1.21E-03                                                    | SAS              | 5.31E-04                                                    | 0.022              | 1                            |
| 393 | <i>MAD2L2</i> | SG               | 0                                                           | AFR              | 2.73E-04                                                    | 0.092              | 1                            |
| 394 | <i>MAD2L2</i> | SG               | 0                                                           | AMR              | 5.91E-05                                                    | 0.004              | 1                            |
| 395 | <i>MAD2L2</i> | SG               | 0                                                           | ASJ              | 2.11E-04                                                    | 0.171              | 1                            |
| 396 | <i>MAD2L2</i> | SG               | 0                                                           | EAS              | 3.43E-04                                                    | 0.110              | 1                            |
| 397 | <i>MAD2L2</i> | SG               | 0                                                           | FIN              | 0                                                           | 0.004              | 1                            |
| 398 | <i>MAD2L2</i> | SG               | 0                                                           | NFE              | 2.57E-04                                                    | 0.022              | 1                            |
| 399 | <i>MAD2L2</i> | SG               | 0                                                           | SAS              | 6.64E-05                                                    | 0.006              | 1                            |
| 400 | <i>MAD2L2</i> | AFR              | 2.73E-04                                                    | AMR              | 5.91E-05                                                    | 0.219              | 1                            |
| 401 | <i>MAD2L2</i> | AFR              | 2.73E-04                                                    | ASJ              | 2.11E-04                                                    | 1                  | 1                            |
| 402 | <i>MAD2L2</i> | AFR              | 2.73E-04                                                    | EAS              | 3.43E-04                                                    | 1                  | 1                            |
| 403 | <i>MAD2L2</i> | AFR              | 2.73E-04                                                    | FIN              | 0                                                           | 0.166              | 1                            |

| No. | Gene          | Ancestry group 1 | Cohort size-normalized carrier frequency (Ancestry group 1) | Ancestry group 2 | Cohort size-normalized carrier frequency (Ancestry group 2) | Unadjusted p-value | Bonferroni-corrected p-value |
|-----|---------------|------------------|-------------------------------------------------------------|------------------|-------------------------------------------------------------|--------------------|------------------------------|
| 404 | <i>MAD2L2</i> | AFR              | 2.73E-04                                                    | NFE              | 2.57E-04                                                    | 1                  | 1                            |
| 405 | <i>MAD2L2</i> | AFR              | 2.73E-04                                                    | SAS              | 6.64E-05                                                    | 0.251              | 1                            |
| 406 | <i>MAD2L2</i> | AMR              | 5.91E-05                                                    | ASJ              | 2.11E-04                                                    | 0.390              | 1                            |
| 407 | <i>MAD2L2</i> | AMR              | 5.91E-05                                                    | EAS              | 3.43E-04                                                    | 0.118              | 1                            |
| 408 | <i>MAD2L2</i> | AMR              | 5.91E-05                                                    | FIN              | 0                                                           | 1                  | 1                            |
| 409 | <i>MAD2L2</i> | AMR              | 5.91E-05                                                    | NFE              | 2.57E-04                                                    | 0.213              | 1                            |
| 410 | <i>MAD2L2</i> | AMR              | 5.91E-05                                                    | SAS              | 6.64E-05                                                    | 1                  | 1                            |
| 411 | <i>MAD2L2</i> | ASJ              | 2.11E-04                                                    | EAS              | 3.43E-04                                                    | 1                  | 1                            |
| 412 | <i>MAD2L2</i> | ASJ              | 2.11E-04                                                    | FIN              | 0                                                           | 0.308              | 1                            |
| 413 | <i>MAD2L2</i> | ASJ              | 2.11E-04                                                    | NFE              | 2.57E-04                                                    | 1                  | 1                            |
| 414 | <i>MAD2L2</i> | ASJ              | 2.11E-04                                                    | SAS              | 6.64E-05                                                    | 0.421              | 1                            |
| 415 | <i>MAD2L2</i> | EAS              | 3.43E-04                                                    | FIN              | 0                                                           | 0.092              | 1                            |
| 416 | <i>MAD2L2</i> | EAS              | 3.43E-04                                                    | NFE              | 2.57E-04                                                    | 0.720              | 1                            |
| 417 | <i>MAD2L2</i> | EAS              | 3.43E-04                                                    | SAS              | 6.64E-05                                                    | 0.144              | 1                            |
| 418 | <i>MAD2L2</i> | FIN              | 0                                                           | NFE              | 2.57E-04                                                    | 0.143              | 1                            |
| 419 | <i>MAD2L2</i> | FIN              | 0                                                           | SAS              | 6.64E-05                                                    | 1                  | 1                            |
| 420 | <i>MAD2L2</i> | NFE              | 2.57E-04                                                    | SAS              | 6.64E-05                                                    | 0.213              | 1                            |
| 421 | <i>RFWD3</i>  | SG               | 2.84E-04                                                    | AFR              | 8.19E-04                                                    | 0.440              | 1                            |
| 422 | <i>RFWD3</i>  | SG               | 2.84E-04                                                    | AMR              | 3.55E-04                                                    | 1                  | 1                            |
| 423 | <i>RFWD3</i>  | SG               | 2.84E-04                                                    | ASJ              | 2.11E-04                                                    | 1                  | 1                            |
| 424 | <i>RFWD3</i>  | SG               | 2.84E-04                                                    | EAS              | 1.03E-03                                                    | 0.299              | 1                            |
| 425 | <i>RFWD3</i>  | SG               | 2.84E-04                                                    | FIN              | 9.38E-05                                                    | 0.435              | 1                            |
| 426 | <i>RFWD3</i>  | SG               | 2.84E-04                                                    | NFE              | 5.73E-04                                                    | 0.720              | 1                            |
| 427 | <i>RFWD3</i>  | SG               | 2.84E-04                                                    | SAS              | 6.64E-04                                                    | 0.702              | 1                            |
| 428 | <i>RFWD3</i>  | AFR              | 8.19E-04                                                    | AMR              | 3.55E-04                                                    | 0.204              | 1                            |
| 429 | <i>RFWD3</i>  | AFR              | 8.19E-04                                                    | ASJ              | 2.11E-04                                                    | 0.258              | 1                            |
| 430 | <i>RFWD3</i>  | AFR              | 8.19E-04                                                    | EAS              | 1.03E-03                                                    | 0.798              | 1                            |

| No. | Gene         | Ancestry group 1 | Cohort size-normalized carrier frequency (Ancestry group 1) | Ancestry group 2 | Cohort size-normalized carrier frequency (Ancestry group 2) | Unadjusted p-value | Bonferroni-corrected p-value |
|-----|--------------|------------------|-------------------------------------------------------------|------------------|-------------------------------------------------------------|--------------------|------------------------------|
| 431 | <i>RFWD3</i> | AFR              | 8.19E-04                                                    | FIN              | 9.38E-05                                                    | 0.021              | 1                            |
| 432 | <i>RFWD3</i> | AFR              | 8.19E-04                                                    | NFE              | 5.73E-04                                                    | 0.441              | 1                            |
| 433 | <i>RFWD3</i> | AFR              | 8.19E-04                                                    | SAS              | 6.64E-04                                                    | 0.790              | 1                            |
| 434 | <i>RFWD3</i> | AMR              | 3.55E-04                                                    | ASJ              | 2.11E-04                                                    | 1                  | 1                            |
| 435 | <i>RFWD3</i> | AMR              | 3.55E-04                                                    | EAS              | 1.03E-03                                                    | 0.052              | 1                            |
| 436 | <i>RFWD3</i> | AMR              | 3.55E-04                                                    | FIN              | 9.38E-05                                                    | 0.261              | 1                            |
| 437 | <i>RFWD3</i> | AMR              | 3.55E-04                                                    | NFE              | 5.73E-04                                                    | 0.334              | 1                            |
| 438 | <i>RFWD3</i> | AMR              | 3.55E-04                                                    | SAS              | 6.64E-04                                                    | 0.317              | 1                            |
| 439 | <i>RFWD3</i> | ASJ              | 2.11E-04                                                    | EAS              | 1.03E-03                                                    | 0.181              | 1                            |
| 440 | <i>RFWD3</i> | ASJ              | 2.11E-04                                                    | FIN              | 9.38E-05                                                    | 0.521              | 1                            |
| 441 | <i>RFWD3</i> | ASJ              | 2.11E-04                                                    | NFE              | 5.73E-04                                                    | 0.512              | 1                            |
| 442 | <i>RFWD3</i> | ASJ              | 2.11E-04                                                    | SAS              | 6.64E-04                                                    | 0.478              | 1                            |
| 443 | <i>RFWD3</i> | EAS              | 1.03E-03                                                    | FIN              | 9.38E-05                                                    | 0.007              | 1                            |
| 444 | <i>RFWD3</i> | EAS              | 1.03E-03                                                    | NFE              | 5.73E-04                                                    | 0.164              | 1                            |
| 445 | <i>RFWD3</i> | EAS              | 1.03E-03                                                    | SAS              | 6.64E-04                                                    | 0.349              | 1                            |
| 446 | <i>RFWD3</i> | FIN              | 9.38E-05                                                    | NFE              | 5.73E-04                                                    | 0.050              | 1                            |
| 447 | <i>RFWD3</i> | FIN              | 9.38E-05                                                    | SAS              | 6.64E-04                                                    | 0.032              | 1                            |
| 448 | <i>RFWD3</i> | NFE              | 5.73E-04                                                    | SAS              | 6.64E-04                                                    | 0.703              | 1                            |

<sup>a</sup> Adjusted p value threshold of <0.05 is considered significant event. SG: Singaporean, EAS: East Asian, SAS: South Asian, AFR: African-American, NFE: Non-Finnish European, FIN: Finnish European, ASJ: Ashkenazi Jewish, AMR: Admixed-American/Latino.



| Gene  | SG                              |    |              | EAS                           |    |              | SAS                                  |    |              | AFR                                 |    |                             | NFE                                 |              |                          | FIN                                  |              |              | ASJ     |    |                                       | AMR                              |              |              |
|-------|---------------------------------|----|--------------|-------------------------------|----|--------------|--------------------------------------|----|--------------|-------------------------------------|----|-----------------------------|-------------------------------------|--------------|--------------------------|--------------------------------------|--------------|--------------|---------|----|---------------------------------------|----------------------------------|--------------|--------------|
|       | Variant                         | AC | AF           | Variant                       | AC | AF           | Variant                              | AC | AF           | Variant                             | AC | AF                          | Variant                             | AC           | AF                       | Variant                              | AC           | AF           | Variant | AC | AF                                    | Variant                          | AC           | AF           |
| FANCF | Nil                             |    |              | c.235G>T<br>(p.Gly79*)        | 2  | 1.13<br>E-04 | c.484_485del<br>(p.Leu162Aspfs*103)  | 7  | 2.29<br>E-04 | c.484_485del<br>(p.Leu162Aspfs*103) | 2  | 1.40<br>E-04                | c.1087C>T<br>(p.Gln363*)            | 10           | 9.73<br>E-05             | *                                    |              |              | Nil     |    |                                       | c.1087C>T<br>(p.Gln363*)         | 6            | 1.75<br>E-04 |
|       |                                 |    |              | c.167del<br>(p.Thr56Argfs*25) | 2  | 1.13<br>E-04 |                                      |    |              | c.230_252del<br>(p.Val77Glyfs*6)    | 2  | 1.35<br>E-04                | c.484_485del<br>(p.Leu162Aspfs*103) | 8            | 7.82<br>E-05             |                                      |              |              |         |    |                                       |                                  |              |              |
|       |                                 |    |              |                               |    |              |                                      |    |              |                                     |    |                             | c.351_397del<br>(p.Gly120Profs*17)  | 3            | 2.94<br>E-05             |                                      |              |              |         |    |                                       |                                  |              |              |
|       |                                 |    |              |                               |    |              |                                      |    |              |                                     |    |                             | c.690del<br>(p.Gly231Glyfs*7)       | 3            | 2.96<br>E-05             |                                      |              |              |         |    |                                       |                                  |              |              |
| FANCG | c.1656dup<br>(p.His553Serfs*14) | 2  | 2.84<br>E-04 | c.307+1G>C                    | 6  | 3.39<br>E-04 | c.366G>C<br>(p.Trp122Cys)            | 68 | 2.23<br>E-03 | c.1852_1853del<br>(p.Lys618Valfs*3) | 5  | 3.36<br>E-04                | c.366G>C<br>(p.Trp122Cys)           | 17           | 1.66<br>E-04             | c.1183_1192del<br>(p.Glu395Trpfs*5)  | 2            | 1.02<br>E-04 | Nil     |    |                                       | c.1077-2A>G                      | 3            | 8.76<br>E-05 |
|       |                                 |    |              |                               |    |              | c.448T>C<br>(p.Trp150Arg)            | 3  | 9.83<br>E-05 |                                     |    |                             | c.1183_1192del<br>(p.Glu395Trpfs*5) | 9            | 8.83<br>E-05             |                                      |              |              |         |    | c.1642C>T<br>(p.Arg548*)              | 2                                | 5.85<br>E-05 |              |
|       |                                 |    |              |                               |    |              | c.1761-2A>C                          | 2  | 6.55<br>E-05 |                                     |    |                             | c.1158dup<br>(p.Ser387Leufs*9)      | 5            | 5.50<br>E-05             |                                      |              |              |         |    |                                       |                                  |              |              |
|       |                                 |    |              |                               |    |              | c.1652_1655del<br>(p.Tyr551Phefs*7)  | 2  | 6.56<br>E-05 |                                     |    |                             | c.1144-1G>T                         | 5            | 4.99<br>E-05             |                                      |              |              |         |    |                                       |                                  |              |              |
|       |                                 |    |              |                               |    |              | c.1044_1057del<br>(p.His348Glnfs*25) | 2  | 6.55<br>E-05 |                                     |    |                             |                                     |              |                          |                                      |              |              |         |    |                                       |                                  |              |              |
| FANCI | *                               |    |              | c.2889+2T>C                   | 2  | 1.13<br>E-04 | c.1890+6_1890+7insATGTAAAA           | 6  | 1.97<br>E-04 | c.1840C>T<br>(p.Arg614*)            | 2  | 1.34<br>E-04                | c.1264G>A<br>(p.Gly422Arg)          | 23           | 2.24<br>E-04             | c.2957_2969del<br>(p.Val986Alafs*39) | 64           | 2.96<br>E-03 | *       |    |                                       | c.3473G>T<br>(p.Cys1158Phe)      | 21           | 6.13<br>E-04 |
|       |                                 |    |              | c.3187-2A>G                   | 2  | 1.13<br>E-04 | c.3007-1G>C                          | 6  | 1.97<br>E-04 | c.3116del<br>(p.Tyr1039Leufs*22)    | 2  | 1.34<br>E-04                | c.3255T>G<br>(p.Cys1085Trp)         | 20           | 1.95<br>E-04             | c.3041G>A<br>(p.Cys1014Tyr)          | 22           | 1.02<br>E-03 |         |    |                                       | c.3493del<br>(p.Asp1165Thrfs*34) | 13           | 3.79<br>E-04 |
|       |                                 |    |              |                               |    |              | c.3853C>T<br>(p.Arg1285*)            | 5  | 1.64<br>E-04 | c.1322T>G<br>(p.Leu441Trp)          | 2  | 1.34<br>E-04                | c.1412C>G<br>(p.Pro471Arg)          | 9            | 8.77<br>E-05             | c.3645C>G<br>(p.Tyr1215*)            | 2            | 9.25<br>E-05 |         |    |                                       | c.3604G>C<br>(p.Gly1202Arg)      | 7            | 2.04<br>E-04 |
|       |                                 |    |              |                               |    |              | c.2456+1G>A                          | 3  | 9.83<br>E-05 | c.3734G>T<br>(p.Arg1245Leu)         | 2  | 1.34<br>E-04                | c.3041G>A<br>(p.Cys1014Tyr)         | 7            | 6.81<br>E-05             | c.1668_1669del<br>(p.Gln557Valfs*24) | 2            | 9.25<br>E-05 |         |    |                                       | c.998C>A<br>(p.Ser333*)          | 4            | 1.36<br>E-04 |
|       |                                 |    |              |                               |    |              |                                      |    |              |                                     |    | c.3466G>C<br>(p.Gly1156Arg) | 7                                   | 6.81<br>E-05 | c.1804C>T<br>(p.Arg602*) | 2                                    | 9.25<br>E-05 |              |         |    | c.3622_3623del<br>(p.Leu1208Valfs*11) | 4                                | 1.17<br>E-04 |              |

| Gene  | SG                               |    |              | EAS                              |    |              | SAS                                   |    |              | AFR                                  |    |              | NFE                                   |     |              | FIN                                  |     |              | ASJ                                  |    |                                     | AMR                                  |              |              |  |
|-------|----------------------------------|----|--------------|----------------------------------|----|--------------|---------------------------------------|----|--------------|--------------------------------------|----|--------------|---------------------------------------|-----|--------------|--------------------------------------|-----|--------------|--------------------------------------|----|-------------------------------------|--------------------------------------|--------------|--------------|--|
|       | Variant                          | AC | AF           | Variant                          | AC | AF           | Variant                               | AC | AF           | Variant                              | AC | AF           | Variant                               | AC  | AF           | Variant                              | AC  | AF           | Variant                              | AC | AF                                  | Variant                              | AC           | AF           |  |
| FANCL | *                                |    |              | *                                |    |              | c.1096_1099dup<br>(p.Thr367Asnfs*13)  | 22 | 7.23<br>E-04 | c.1096_1099dup<br>(p.Thr367Asnfs*13) | 11 | 7.65<br>E-04 | c.1096_1099dup<br>(p.Thr367Asnfs*13)  | 345 | 3.39<br>E-03 | c.1096_1099dup<br>(p.Thr367Asnfs*13) | 39  | 1.82<br>E-03 | c.1096_1099dup<br>(p.Thr367Asnfs*13) | 64 | 6.72<br>E-03                        | c.1096_1099dup<br>(p.Thr367Asnfs*13) | 182          | 5.34<br>E-03 |  |
|       |                                  |    |              |                                  |    |              | c.676C>T<br>(p.Arg226Cys)             | 3  | 9.83<br>E-05 | c.296_297del<br>(p.Gln99Argfs*17)    | 4  | 2.69<br>E-04 | c.677G>A<br>(p.Arg226His)             | 5   | 4.87<br>E-05 | c.89C>A<br>(p.Ser30*)                | 2   | 2.09<br>E-04 | c.1051_1052del<br>(p.Ser351Phefs*2)  | 17 | 4.96<br>E-04                        | c.217-2A>G                           | 2            | 5.85<br>E-05 |  |
|       |                                  |    |              |                                  |    |              | c.982C>T<br>(p.Gln328*)               | 2  | 6.56<br>E-05 | c.680G>C<br>(p.Arg227Thr)            | 2  | 1.34<br>E-04 | c.641T>C<br>(p.Leu214Pro)             | 4   | 3.89<br>E-05 |                                      |     |              |                                      |    |                                     |                                      |              |              |  |
|       |                                  |    |              |                                  |    |              |                                       |    |              | c.1103dup<br>(p.Leu368Phefs*11)      | 2  | 1.39<br>E-04 | c.378del<br>(p.Val127Cysfs*12)        | 3   | 2.93<br>E-05 |                                      |     |              |                                      |    |                                     |                                      |              |              |  |
|       |                                  |    |              |                                  |    |              |                                       |    |              |                                      |    |              | c.274-2A>G                            | 3   | 2.93<br>E-05 |                                      |     |              |                                      |    |                                     |                                      |              |              |  |
| FANCM | c.1015del<br>(p.Asp339Ilefs*18)  | 2  | 2.84<br>E-04 | c.1718G>A<br>(p.Arg573Gln)       | 4  | 2.26<br>E-04 | c.4318-1G>A                           | 19 | 6.24<br>E-04 | c.5791C>T<br>(p.Arg1931*)            | 6  | 4.03<br>E-04 | c.5101C>T<br>(p.Gln1701*)             | 111 | 1.08<br>E-03 | c.5101C>T<br>(p.Gln1701*)            | 178 | 8.23<br>E-03 | Nil                                  |    |                                     | c.5791C>T<br>(p.Arg1931*)            | 12           | 3.50<br>E-04 |  |
|       |                                  |    |              | c.1655T>C<br>(p.Ile552Thr)       | 2  | 1.13<br>E-04 | c.5339_5340insT<br>(p.Lys1780Asnfs*4) | 16 | 5.24<br>E-04 | c.5101C>T<br>(p.Gln1701*)            | 2  | 1.34<br>E-04 | c.5791C>T<br>(p.Arg1931*)             | 106 | 1.03<br>E-03 | c.5791C>T<br>(p.Arg1931*)            | 97  | 4.48<br>E-03 |                                      |    |                                     | c.4820G>A<br>(p.Cys1607Tyr)          | 9            | 2.64<br>E-04 |  |
|       |                                  |    |              |                                  |    |              | c.5340+1_5340+2insAATCACTG            | 16 | 5.25<br>E-04 | c.3628C>T<br>(p.Gln1210*)            | 2  | 1.35<br>E-04 | c.1597C>T<br>(p.Arg533Cys)            | 60  | 5.84<br>E-04 | c.1491dup<br>(p.Gln498Thrfs*7)       | 5   | 2.31<br>E-04 |                                      |    |                                     | c.2260C>T<br>(p.Arg754*)             | 5            | 1.46<br>E-04 |  |
|       |                                  |    |              |                                  |    |              | c.5791C>T<br>(p.Arg1931*)             | 8  | 2.62<br>E-04 | c.5364_5367dup<br>(p.Thr1790*)       | 2  | 1.34<br>E-04 | c.1972C>T<br>(p.Arg658*)              | 11  | 1.07<br>E-04 | c.1597C>T<br>(p.Arg533Cys)           | 4   | 1.85<br>E-04 |                                      |    |                                     | c.5101C>T<br>(p.Gln1701*)            | 4            | 1.17<br>E-04 |  |
|       |                                  |    |              |                                  |    |              | c.2040_2041del<br>(p.Leu680Phefs*6)   | 8  | 2.62<br>E-04 | c.5530del<br>(p.Gln1844Lysfs*2)      | 2  | 1.34<br>E-04 | c.1491dup<br>(p.Gln498Thrfs*7)        | 5   | 4.87<br>E-05 | c.4025_4026del<br>(p.Ser1342*)       | 2   | 9.29<br>E-05 |                                      |    |                                     | c.4637T>G<br>(p.Leu1546*)            | 3            | 9.16<br>E-05 |  |
| SLX4  | c.4693dup<br>(p.Gln1565Profs*16) | 2  | 2.84<br>E-04 | c.4693dup<br>(p.Gln1565Profs*16) | 7  | 3.96<br>E-04 | c.4921dup<br>(p.Val1641Glyfs*15)      | 5  | 1.64<br>E-04 | *                                    |    |              | c.5242C>T<br>(p.Gln1748*)             | 6   | 5.86<br>E-05 | c.5242C>T<br>(p.Gln1748*)            | 2   | 9.41<br>E-05 | Nil                                  |    |                                     | c.1129C>T<br>(p.Gln377*)             | 4            | 1.17<br>E-04 |  |
|       |                                  |    |              | c.4996C>T<br>(p.Arg1666*)        | 3  | 1.70<br>E-04 | c.1163+2T>A                           | 3  | 9.83<br>E-05 |                                      |    |              | c.4089_4090del<br>(p.Asp1365Profs*26) | 5   | 4.88<br>E-05 |                                      |     |              |                                      |    | c.2314_2327del<br>(p.Ser772Valfs*5) | 2                                    | 5.88<br>E-05 |              |  |
|       |                                  |    |              | c.5248del<br>(p.Ala1750Argfs*7)  | 2  | 1.13<br>E-04 | c.2137C>T<br>(p.Arg713*)              | 2  | 6.57<br>E-05 |                                      |    |              | c.2808_2809del<br>(p.Ala938Thrfs*7)   | 5   | 4.87<br>E-05 |                                      |     |              |                                      |    | c.5154-1G>A                         | 2                                    | 5.87<br>E-05 |              |  |
|       |                                  |    |              |                                  |    |              | c.4996C>T<br>(p.Arg1666*)             | 2  | 6.55<br>E-05 |                                      |    |              | c.4259dup<br>(p.Ile1421Asnfs*4)       | 3   | 3.07<br>E-05 |                                      |     |              |                                      |    | c.2700G>A<br>(p.Trp900*)            | 2                                    | 5.84<br>E-05 |              |  |



| Gene         | SG      |    |    | EAS     |    |    | SAS     |    |    | AFR     |    |    | NFE                                 |    |              | FIN     |    |    | ASJ     |    |    | AMR                        |    |              |
|--------------|---------|----|----|---------|----|----|---------|----|----|---------|----|----|-------------------------------------|----|--------------|---------|----|----|---------|----|----|----------------------------|----|--------------|
|              | Variant | AC | AF | Variant                             | AC | AF           | Variant | AC | AF | Variant | AC | AF | Variant                    | AC | AF           |
| <i>RFWD3</i> | *       |    |    | *       |    |    | *       |    |    | *       |    |    | c.1990C>T<br>(p.Arg664*)            | 3  | 2.92<br>E-05 | *       |    |    | *       |    |    | c.1673G>A<br>(p.Gly558Glu) | 2  | 5.85<br>E-05 |
|              |         |    |    |         |    |    |         |    |    |         |    |    | c.582del<br>(p.Thr195Leufs*<br>45)  | 2  | 1.95<br>E-05 |         |    |    |         |    |    |                            |    |              |
|              |         |    |    |         |    |    |         |    |    |         |    |    | c.1126dup<br>(p.Ser376Phefs*<br>13) | 2  | 1.95<br>E-05 |         |    |    |         |    |    |                            |    |              |

<sup>a</sup> Up to top 5 predicted pathogenic variants are listed for each gene. Variants with allele count of 1 are not listed. \*: No recurrent variants identified, only variants with allele count of 1, AC: allele count, AF: allele frequency, Nil: no predicted pathogenic variant identified for the gene. SG: Singaporean, EAS: East Asian, SAS: South Asian, AFR: African-American, NFE: Non-Finnish European, FIN: Finnish European, ASJ: Ashkenazi Jewish, AMR: Admixed-American/Latino.



**Supplementary Table 4: Proportion of total unique variants (adjusted to cohort size) and private variants in each FA gene across ancestry groups<sup>a</sup>**

| Gene          | SG                    |                                                    |                      |                                  | EAS                   |                                                    |                      |                                  | SAS                   |                                                    |                      |                                  | AFR                   |                                                    |                      |                                  |
|---------------|-----------------------|----------------------------------------------------|----------------------|----------------------------------|-----------------------|----------------------------------------------------|----------------------|----------------------------------|-----------------------|----------------------------------------------------|----------------------|----------------------------------|-----------------------|----------------------------------------------------|----------------------|----------------------------------|
|               | Total unique variants | Adjusted fraction of unique variants (per 100,000) | No. private variants | Fraction of private variants (%) | Total unique variants | Adjusted fraction of unique variants (per 100,000) | No. private variants | Fraction of private variants (%) | Total unique variants | Adjusted fraction of unique variants (per 100,000) | No. private variants | Fraction of private variants (%) | Total unique variants | Adjusted fraction of unique variants (per 100,000) | No. private variants | Fraction of private variants (%) |
| <i>FANCA</i>  | 19                    | 539                                                | 16                   | 84%                              | 25                    | 286                                                | 18                   | 72%                              | 44                    | 292                                                | 36                   | 82%                              | 20                    | 273                                                | 14                   | 70%                              |
| <i>FANCC</i>  | 2                     | 57                                                 | 2                    | 100%                             | 5                     | 57                                                 | 5                    | 100%                             | 10                    | 66                                                 | 7                    | 70%                              | 6                     | 82                                                 | 2                    | 33%                              |
| <i>FANCD2</i> | 4                     | 114                                                | 3                    | 75%                              | 9                     | 103                                                | 6                    | 67%                              | 20                    | 133                                                | 18                   | 90%                              | 15                    | 205                                                | 11                   | 73%                              |
| <i>FANCE</i>  | 0                     | 0                                                  | 0                    | 0                                | 1                     | 11                                                 | 1                    | 100%                             | 11                    | 73                                                 | 9                    | 82%                              | 4                     | 55                                                 | 3                    | 75%                              |
| <i>FANCF</i>  | 0                     | 0                                                  | 0                    | 0                                | 3                     | 34                                                 | 1                    | 33%                              | 4                     | 27                                                 | 3                    | 75%                              | 4                     | 55                                                 | 2                    | 50%                              |
| <i>FANCG</i>  | 4                     | 114                                                | 3                    | 75%                              | 3                     | 34                                                 | 2                    | 67%                              | 13                    | 86                                                 | 8                    | 62%                              | 6                     | 82                                                 | 5                    | 83%                              |
| <i>FANCI</i>  | 2                     | 57                                                 | 2                    | 100%                             | 16                    | 183                                                | 14                   | 88%                              | 25                    | 166                                                | 17                   | 68%                              | 21                    | 287                                                | 17                   | 81%                              |
| <i>FANCL</i>  | 2                     | 57                                                 | 2                    | 100%                             | 7                     | 80                                                 | 7                    | 100%                             | 16                    | 106                                                | 13                   | 81%                              | 9                     | 123                                                | 5                    | 56%                              |
| <i>FANCM</i>  | 6                     | 170                                                | 5                    | 83%                              | 11                    | 126                                                | 9                    | 82%                              | 20                    | 133                                                | 11                   | 55%                              | 11                    | 150                                                | 6                    | 55%                              |
| <i>SLX4</i>   | 2                     | 57                                                 | 1                    | 50%                              | 16                    | 183                                                | 13                   | 81%                              | 19                    | 126                                                | 14                   | 74%                              | 3                     | 41                                                 | 3                    | 100%                             |
| <i>ERCC4</i>  | 2                     | 57                                                 | 2                    | 100%                             | 10                    | 114                                                | 7                    | 70%                              | 23                    | 153                                                | 13                   | 57%                              | 8                     | 109                                                | 5                    | 63%                              |
| <i>RAD51</i>  | 1                     | 28                                                 | 1                    | 100%                             | 1                     | 11                                                 | 1                    | 100%                             | 3                     | 20                                                 | 3                    | 100%                             | 2                     | 27                                                 | 1                    | 50%                              |
| <i>UBE2T</i>  | 2                     | 57                                                 | 1                    | 50%                              | 6                     | 69                                                 | 5                    | 83%                              | 3                     | 20                                                 | 3                    | 100%                             | 3                     | 41                                                 | 2                    | 67%                              |
| <i>XRCC2</i>  | 4                     | 114                                                | 4                    | 100%                             | 1                     | 11                                                 | 1                    | 100%                             | 8                     | 53                                                 | 8                    | 100%                             | 2                     | 27                                                 | 2                    | 100%                             |
| <i>MAD2L2</i> | 0                     | 0                                                  | 0                    | 0                                | 3                     | 34                                                 | 3                    | 100%                             | 1                     | 7                                                  | 1                    | 100%                             | 2                     | 27                                                 | 2                    | 100%                             |
| <i>RFWD3</i>  | 1                     | 28                                                 | 1                    | 100%                             | 9                     | 103                                                | 9                    | 100%                             | 10                    | 66                                                 | 10                   | 100%                             | 6                     | 82                                                 | 6                    | 100%                             |

| Gene          | NFE                   |                                                    |                      |                                  | FIN                   |                                                    |                      |                                  | ASJ                   |                                                    |                      |                                  | AMR                   |                                                    |                      |                                  |
|---------------|-----------------------|----------------------------------------------------|----------------------|----------------------------------|-----------------------|----------------------------------------------------|----------------------|----------------------------------|-----------------------|----------------------------------------------------|----------------------|----------------------------------|-----------------------|----------------------------------------------------|----------------------|----------------------------------|
|               | Total unique variants | Adjusted fraction of unique variants (per 100,000) | No. private variants | Fraction of private variants (%) | Total unique variants | Adjusted fraction of unique variants (per 100,000) | No. private variants | Fraction of private variants (%) | Total unique variants | Adjusted fraction of unique variants (per 100,000) | No. private variants | Fraction of private variants (%) | Total unique variants | Adjusted fraction of unique variants (per 100,000) | No. private variants | Fraction of private variants (%) |
| <i>FANCA</i>  | 112                   | 221                                                | 78                   | 70%                              | 7                     | 66                                                 | 4                    | 57%                              | 4                     | 84                                                 | 2                    | 50%                              | 38                    | 236                                                | 22                   | 58%                              |
| <i>FANCC</i>  | 30                    | 59                                                 | 20                   | 67%                              | 2                     | 19                                                 | 2                    | 100%                             | 1                     | 21                                                 | 1                    | 100%                             | 8                     | 50                                                 | 6                    | 75%                              |
| <i>FANCD2</i> | 52                    | 103                                                | 40                   | 77%                              | 5                     | 47                                                 | 4                    | 80%                              | 3                     | 63                                                 | 1                    | 33%                              | 23                    | 143                                                | 15                   | 65%                              |
| <i>FANCE</i>  | 12                    | 24                                                 | 11                   | 92%                              | 0                     | 0                                                  | 0                    | 0                                | 1                     | 21                                                 | 1                    | 100%                             | 3                     | 19                                                 | 2                    | 67%                              |
| <i>FANCF</i>  | 18                    | 36                                                 | 12                   | 67%                              | 1                     | 9                                                  | 1                    | 100%                             | 0                     | 0                                                  | 0                    | 0                                | 3                     | 19                                                 | 2                    | 67%                              |
| <i>FANCG</i>  | 32                    | 63                                                 | 18                   | 56%                              | 3                     | 28                                                 | 2                    | 67%                              | 0                     | 0                                                  | 0                    | 0                                | 11                    | 68                                                 | 9                    | 82%                              |
| <i>FANCI</i>  | 66                    | 130                                                | 42                   | 64%                              | 10                    | 94                                                 | 5                    | 50%                              | 2                     | 42                                                 | 2                    | 100%                             | 21                    | 130                                                | 13                   | 62%                              |
| <i>FANCL</i>  | 34                    | 67                                                 | 22                   | 65%                              | 1                     | 9                                                  | 0                    | 0                                | 4                     | 84                                                 | 2                    | 50%                              | 8                     | 50                                                 | 5                    | 63%                              |
| <i>FANCM</i>  | 53                    | 105                                                | 36                   | 68%                              | 7                     | 66                                                 | 2                    | 29%                              | 0                     | 0                                                  | 0                    | 0                                | 18                    | 112                                                | 11                   | 61%                              |
| <i>SLX4</i>   | 52                    | 103                                                | 40                   | 77%                              | 5                     | 47                                                 | 4                    | 80%                              | 0                     | 0                                                  | 0                    | 0                                | 14                    | 87                                                 | 10                   | 71%                              |
| <i>ERCC4</i>  | 56                    | 111                                                | 37                   | 66%                              | 6                     | 56                                                 | 5                    | 83%                              | 2                     | 42                                                 | 1                    | 50%                              | 16                    | 99                                                 | 12                   | 75%                              |
| <i>RAD51</i>  | 2                     | 4                                                  | 2                    | 100%                             | 1                     | 9                                                  | 1                    | 100%                             | 0                     | 0                                                  | 0                    | 0                                | 1                     | 6                                                  | 1                    | 100%                             |
| <i>UBE2T</i>  | 7                     | 14                                                 | 6                    | 86%                              | 1                     | 9                                                  | 1                    | 100%                             | 0                     | 0                                                  | 0                    | 0                                | 5                     | 31                                                 | 3                    | 60%                              |
| <i>XRCC2</i>  | 18                    | 36                                                 | 8                    | 44%                              | 4                     | 38                                                 | 2                    | 50%                              | 3                     | 63                                                 | 2                    | 67%                              | 10                    | 62                                                 | 6                    | 60%                              |
| <i>MAD2L2</i> | 8                     | 16                                                 | 6                    | 75%                              | 0                     | 0                                                  | 0                    | 0                                | 1                     | 21                                                 | 1                    | 100%                             | 1                     | 6                                                  | 1                    | 100%                             |
| <i>RFWD3</i>  | 25                    | 49                                                 | 22                   | 88%                              | 1                     | 9                                                  | 1                    | 1                                | 1                     | 21                                                 | 1                    | 100%                             | 5                     | 31                                                 | 4                    | 80%                              |

<sup>a</sup> Private variants are defined as variants that occurred in only single individual within the ancestry group. SG: Singaporean, EAS: East Asian, SAS: South Asian, AFR: African-American, NFE: Non-Finnish European, FIN: Finnish European, ASJ: Ashkenazi Jewish, AMR: Admixed-American/Latino.

**Supplementary Table 5: Carrier frequency of potentially pathogenic germline variants identified in White (non-Hispanic) racial subset of patients from the selected TCGA cohorts**

| TCGA cohort                    | TCGA-BRCA    |                    | TCGA-HNSC    |                    | TCGA-LUAD    |                    | TCGA-LUSC    |                    | TCGA-OV      |                    | TCGA-UCEC    |                    | TCGA-UCS     |                    |
|--------------------------------|--------------|--------------------|--------------|--------------------|--------------|--------------------|--------------|--------------------|--------------|--------------------|--------------|--------------------|--------------|--------------------|
| Individuals with germline data | 693          |                    | 430          |                    | 385          |                    | 343          |                    | 381          |                    | 363          |                    | 43           |                    |
|                                | No. carriers | Carrier frequency* |
| <i>FANCA</i>                   | 12           | 1.73%              | 8            | 1.86%              | 6            | 1.56%              | 6            | 1.75%              | 4            | 1.05%              | 2            | 0.55%              | 0            | 0                  |
| <i>FANCB</i>                   | 0            | 0                  | 0            | 0                  | 0            | 0                  | 0            | 0                  | 0            | 0                  | 0            | 0                  | 0            | 0                  |
| <i>FANCC</i>                   | 1            | 0.14%              | 2            | 0.47%              | 0            | 0                  | 1            | 0.29%              | 0            | 0                  | 0            | 0                  | 0            | 0                  |
| <i>FANCD2</i>                  | 3            | 0.43%              | 1            | 0.23%              | 1            | 0.26%              | 1            | 0.29%              | 2            | 0.52%              | 0            | 0                  | 0            | 0                  |
| <i>FANCE</i>                   | 0            | 0                  | 0            | 0                  | 0            | 0                  | 0            | 0                  | 0            | 0                  | 0            | 0                  | 0            | 0                  |
| <i>FANCF</i>                   | 0            | 0                  | 0            | 0                  | 1            | 0.26%              | 0            | 0                  | 0            | 0                  | 1            | 0.28%              | 0            | 0                  |
| <i>FANCG</i>                   | 0            | 0                  | 2            | 0.47%              | 1            | 0.26%              | 2            | 0.58%              | 1            | 0.26%              | 1            | 0.28%              | 1            | 2.33%              |
| <i>FANCI</i>                   | 2            | 0.29%              | 2            | 0.47%              | 2            | 0.52%              | 0            | 0                  | 0            | 0                  | 2            | 0.55%              | 0            | 0                  |
| <i>FANCL</i>                   | 5            | 0.72%              | 2            | 0.47%              | 4            | 1.04%              | 2            | 0.58%              | 6            | 1.57%              | 2            | 0.55%              | 0            | 0                  |
| <i>FANCM</i>                   | 9            | 1.30%              | 3            | 0.70%              | 2            | 0.52%              | 1            | 0.29%              | 0            | 0                  | 1            | 0.28%              | 0            | 0                  |
| <i>SLX4</i>                    | 1            | 0.14%              | 0            | 0                  | 0            | 0                  | 0            | 0                  | 0            | 0                  | 2            | 0.55%              | 0            | 0                  |
| <i>ERCC4</i>                   | 0            | 0                  | 1            | 0.23%              | 0            | 0                  | 0            | 0                  | 0            | 0                  | 0            | 0                  | 0            | 0                  |
| <i>RAD51</i>                   | 0            | 0                  | 0            | 0                  | 0            | 0                  | 0            | 0                  | 0            | 0                  | 0            | 0                  | 0            | 0                  |
| <i>UBE2T</i>                   | 0            | 0                  | 0            | 0                  | 0            | 0                  | 0            | 0                  | 1            | 0.26%              | 0            | 0                  | 0            | 0                  |
| <i>XRCC2</i>                   | 4            | 0.58%              | 0            | 0                  | 1            | 0.26%              | 0            | 0                  | 0            | 0                  | 0            | 0                  | 0            | 0                  |
| <i>MAD2L2</i>                  | 0            | 0                  | 0            | 0                  | 0            | 0                  | 0            | 0                  | 0            | 0                  | 0            | 0                  | 0            | 0                  |
| <i>RFWD3</i>                   | 0            | 0.00%              | 0            | 0                  | 0            | 0                  | 1            | 0.29%              | 0            | 0                  | 0            | 0                  | 0            | 0                  |

\*Carrier frequency is normalized to number of cases with available germline data. TCGA-BRCA: breast invasive carcinoma, TCGA-HNSC: head and neck squamous cell carcinoma, TCGA-LUAD: lung adenocarcinoma, TCGA-LUSC: lung squamous cell carcinoma, TCGA-OV: ovarian serous cystadenocarcinoma, TCGA-UCEC: uterine corpus endometrial carcinoma, TCGA-UCS: uterine carcinosarcoma

**Supplementary Table 6: Pairwise differences in proportion of germline variant carrier frequency in the 6 TCGA cohorts evaluated by two-tailed Fisher's exact test, with Bonferroni correction for multiple testing (195 tests)<sup>a</sup>**

| No. | Gene  | TCGA group 1 | Cohort size-normalized carrier frequency (TCGA group 1) | TCGA group 2 | Cohort size-normalized carrier frequency (TCGA group 2) | Unadjusted p-value | Bonferroni-adjusted p-value |
|-----|-------|--------------|---------------------------------------------------------|--------------|---------------------------------------------------------|--------------------|-----------------------------|
| 1   | FANCA | BRCA         | 1.73E-02                                                | HNSC         | 1.86E-02                                                | 1                  | 1                           |
| 2   | FANCA | BRCA         | 1.73E-02                                                | LUAD         | 1.56E-02                                                | 1                  | 1                           |
| 3   | FANCA | BRCA         | 1.73E-02                                                | LUSC         | 1.75E-02                                                | 1                  | 1                           |
| 4   | FANCA | BRCA         | 1.73E-02                                                | OV           | 1.05E-02                                                | 0.44               | 1                           |
| 5   | FANCA | BRCA         | 1.73E-02                                                | UCEC         | 5.51E-03                                                | 0.16               | 1                           |
| 6   | FANCA | HNSC         | 1.86E-02                                                | LUAD         | 1.56E-02                                                | 0.79               | 1                           |
| 7   | FANCA | HNSC         | 1.86E-02                                                | LUSC         | 1.75E-02                                                | 1                  | 1                           |
| 8   | FANCA | HNSC         | 1.86E-02                                                | OV           | 1.05E-02                                                | 0.39               | 1                           |
| 9   | FANCA | HNSC         | 1.86E-02                                                | UCEC         | 5.51E-03                                                | 0.12               | 1                           |
| 10  | FANCA | LUAD         | 1.56E-02                                                | LUSC         | 1.75E-02                                                | 1                  | 1                           |
| 11  | FANCA | LUAD         | 1.56E-02                                                | OV           | 1.05E-02                                                | 0.75               | 1                           |
| 12  | FANCA | LUAD         | 1.56E-02                                                | UCEC         | 5.51E-03                                                | 0.29               | 1                           |
| 13  | FANCA | LUSC         | 1.75E-02                                                | OV           | 1.05E-02                                                | 0.53               | 1                           |
| 14  | FANCA | LUSC         | 1.75E-02                                                | UCEC         | 5.51E-03                                                | 0.17               | 1                           |
| 15  | FANCA | OV           | 1.05E-02                                                | UCEC         | 5.51E-03                                                | 0.69               | 1                           |
| 16  | FANCC | BRCA         | 1.44E-03                                                | HNSC         | 4.65E-03                                                | 0.56               | 1                           |
| 17  | FANCC | BRCA         | 1.44E-03                                                | LUAD         | 0                                                       | 1                  | 1                           |
| 18  | FANCC | BRCA         | 1.44E-03                                                | LUSC         | 2.92E-03                                                | 0.55               | 1                           |
| 19  | FANCC | BRCA         | 1.44E-03                                                | OV           | 0                                                       | 1                  | 1                           |
| 20  | FANCC | BRCA         | 1.44E-03                                                | UCEC         | 0                                                       | 1                  | 1                           |
| 21  | FANCC | HNSC         | 4.65E-03                                                | LUAD         | 0                                                       | 0.50               | 1                           |
| 22  | FANCC | HNSC         | 4.65E-03                                                | LUSC         | 2.92E-03                                                | 1                  | 1                           |
| 23  | FANCC | HNSC         | 4.65E-03                                                | OV           | 0                                                       | 0.50               | 1                           |
| 24  | FANCC | HNSC         | 4.65E-03                                                | UCEC         | 0                                                       | 0.50               | 1                           |
| 25  | FANCC | LUAD         | 0                                                       | LUSC         | 2.92E-03                                                | 0.47               | 1                           |

| No. | Gene          | TCGA group 1 | Cohort size-normalized carrier frequency (TCGA group 1) | TCGA group 2 | Cohort size-normalized carrier frequency (TCGA group 2) | Unadjusted p-value | Bonferroni-adjusted p-value |
|-----|---------------|--------------|---------------------------------------------------------|--------------|---------------------------------------------------------|--------------------|-----------------------------|
| 26  | <i>FANCC</i>  | LUAD         | 0                                                       | OV           | 0                                                       | 1                  | 1                           |
| 27  | <i>FANCC</i>  | LUAD         | 0                                                       | UCEC         | 0                                                       | 1                  | 1                           |
| 28  | <i>FANCC</i>  | LUSC         | 2.92E-03                                                | OV           | 0                                                       | 0.47               | 1                           |
| 29  | <i>FANCC</i>  | LUSC         | 2.92E-03                                                | UCEC         | 0                                                       | 0.49               | 1                           |
| 30  | <i>FANCC</i>  | OV           | 0                                                       | UCEC         | 0                                                       | 1                  | 1                           |
| 31  | <i>FANCD2</i> | BRCA         | 4.33E-03                                                | HNSC         | 2.33E-03                                                | 1                  | 1                           |
| 32  | <i>FANCD2</i> | BRCA         | 4.33E-03                                                | LUAD         | 2.60E-03                                                | 1                  | 1                           |
| 33  | <i>FANCD2</i> | BRCA         | 4.33E-03                                                | LUSC         | 2.92E-03                                                | 1                  | 1                           |
| 34  | <i>FANCD2</i> | BRCA         | 4.33E-03                                                | OV           | 5.25E-03                                                | 1                  | 1                           |
| 35  | <i>FANCD2</i> | BRCA         | 4.33E-03                                                | UCEC         | 0                                                       | 0.56               | 1                           |
| 36  | <i>FANCD2</i> | HNSC         | 2.33E-03                                                | LUAD         | 2.60E-03                                                | 1                  | 1                           |
| 37  | <i>FANCD2</i> | HNSC         | 2.33E-03                                                | LUSC         | 2.92E-03                                                | 1                  | 1                           |
| 38  | <i>FANCD2</i> | HNSC         | 2.33E-03                                                | OV           | 5.25E-03                                                | 0.60               | 1                           |
| 39  | <i>FANCD2</i> | HNSC         | 2.33E-03                                                | UCEC         | 0                                                       | 1                  | 1                           |
| 40  | <i>FANCD2</i> | LUAD         | 2.60E-03                                                | LUSC         | 2.92E-03                                                | 1                  | 1                           |
| 41  | <i>FANCD2</i> | LUAD         | 2.60E-03                                                | OV           | 5.25E-03                                                | 0.62               | 1                           |
| 42  | <i>FANCD2</i> | LUAD         | 2.60E-03                                                | UCEC         | 0                                                       | 1                  | 1                           |
| 43  | <i>FANCD2</i> | LUSC         | 2.92E-03                                                | OV           | 5.25E-03                                                | 1                  | 1                           |
| 44  | <i>FANCD2</i> | LUSC         | 2.92E-03                                                | UCEC         | 0                                                       | 0.49               | 1                           |
| 45  | <i>FANCD2</i> | OV           | 5.25E-03                                                | UCEC         | 0                                                       | 0.50               | 1                           |
| 46  | <i>FANCF</i>  | BRCA         | 0                                                       | HNSC         | 0                                                       | 1                  | 1                           |
| 47  | <i>FANCF</i>  | BRCA         | 0                                                       | LUAD         | 2.60E-03                                                | 0.36               | 1                           |
| 48  | <i>FANCF</i>  | BRCA         | 0                                                       | LUSC         | 0                                                       | 1                  | 1                           |
| 49  | <i>FANCF</i>  | BRCA         | 0                                                       | OV           | 0                                                       | 1                  | 1                           |
| 50  | <i>FANCF</i>  | BRCA         | 0                                                       | UCEC         | 2.75E-03                                                | 0.34               | 1                           |
| 51  | <i>FANCF</i>  | HNSC         | 0                                                       | LUAD         | 2.60E-03                                                | 0.47               | 1                           |
| 52  | <i>FANCF</i>  | HNSC         | 0                                                       | LUSC         | 0                                                       | 1                  | 1                           |

| No. | Gene         | TCGA group 1 | Cohort size-normalized carrier frequency (TCGA group 1) | TCGA group 2 | Cohort size-normalized carrier frequency (TCGA group 2) | Unadjusted p-value | Bonferroni-adjusted p-value |
|-----|--------------|--------------|---------------------------------------------------------|--------------|---------------------------------------------------------|--------------------|-----------------------------|
| 53  | <i>FANCF</i> | HNSC         | 0                                                       | OV           | 0                                                       | 1                  | 1                           |
| 54  | <i>FANCF</i> | HNSC         | 0                                                       | UCEC         | 2.75E-03                                                | 0.46               | 1                           |
| 55  | <i>FANCF</i> | LUAD         | 2.60E-03                                                | LUSC         | 0                                                       | 1                  | 1                           |
| 56  | <i>FANCF</i> | LUAD         | 2.60E-03                                                | OV           | 0                                                       | 1                  | 1                           |
| 57  | <i>FANCF</i> | LUAD         | 2.60E-03                                                | UCEC         | 2.75E-03                                                | 1                  | 1                           |
| 58  | <i>FANCF</i> | LUSC         | 0                                                       | OV           | 0                                                       | 1                  | 1                           |
| 59  | <i>FANCF</i> | LUSC         | 0                                                       | UCEC         | 2.75E-03                                                | 1                  | 1                           |
| 60  | <i>FANCF</i> | OV           | 0                                                       | UCEC         | 2.75E-03                                                | 0.49               | 1                           |
| 61  | <i>FANCG</i> | BRCA         | 0                                                       | HNSC         | 4.65E-03                                                | 0.15               | 1                           |
| 62  | <i>FANCG</i> | BRCA         | 0                                                       | LUAD         | 2.60E-03                                                | 0.36               | 1                           |
| 63  | <i>FANCG</i> | BRCA         | 0                                                       | LUSC         | 5.83E-03                                                | 0.11               | 1                           |
| 64  | <i>FANCG</i> | BRCA         | 0                                                       | OV           | 2.62E-03                                                | 0.35               | 1                           |
| 65  | <i>FANCG</i> | BRCA         | 0                                                       | UCEC         | 2.75E-03                                                | 0.34               | 1                           |
| 66  | <i>FANCG</i> | HNSC         | 4.65E-03                                                | LUAD         | 2.60E-03                                                | 1                  | 1                           |
| 67  | <i>FANCG</i> | HNSC         | 4.65E-03                                                | LUSC         | 5.83E-03                                                | 1                  | 1                           |
| 68  | <i>FANCG</i> | HNSC         | 4.65E-03                                                | OV           | 2.62E-03                                                | 1                  | 1                           |
| 69  | <i>FANCG</i> | HNSC         | 4.65E-03                                                | UCEC         | 2.75E-03                                                | 1                  | 1                           |
| 70  | <i>FANCG</i> | LUAD         | 2.60E-03                                                | LUSC         | 5.83E-03                                                | 0.60               | 1                           |
| 71  | <i>FANCG</i> | LUAD         | 2.60E-03                                                | OV           | 2.62E-03                                                | 1                  | 1                           |
| 72  | <i>FANCG</i> | LUAD         | 2.60E-03                                                | UCEC         | 2.75E-03                                                | 1                  | 1                           |
| 73  | <i>FANCG</i> | LUSC         | 5.83E-03                                                | OV           | 2.62E-03                                                | 0.61               | 1                           |
| 74  | <i>FANCG</i> | LUSC         | 5.83E-03                                                | UCEC         | 2.75E-03                                                | 0.61               | 1                           |
| 75  | <i>FANCG</i> | OV           | 2.62E-03                                                | UCEC         | 2.75E-03                                                | 1                  | 1                           |
| 76  | <i>FANCI</i> | BRCA         | 2.89E-03                                                | HNSC         | 4.65E-03                                                | 0.64               | 1                           |
| 77  | <i>FANCI</i> | BRCA         | 2.89E-03                                                | LUAD         | 5.19E-03                                                | 0.62               | 1                           |
| 78  | <i>FANCI</i> | BRCA         | 2.89E-03                                                | LUSC         | 0                                                       | 1                  | 1                           |
| 79  | <i>FANCI</i> | BRCA         | 2.89E-03                                                | OV           | 0                                                       | 0.54               | 1                           |

| No. | Gene         | TCGA group 1 | Cohort size-normalized carrier frequency (TCGA group 1) | TCGA group 2 | Cohort size-normalized carrier frequency (TCGA group 2) | Unadjusted p-value | Bonferroni-adjusted p-value |
|-----|--------------|--------------|---------------------------------------------------------|--------------|---------------------------------------------------------|--------------------|-----------------------------|
| 80  | <i>FANCI</i> | BRCA         | 2.89E-03                                                | UCEC         | 5.51E-03                                                | 0.61               | 1                           |
| 81  | <i>FANCI</i> | HNSC         | 4.65E-03                                                | LUAD         | 5.19E-03                                                | 1                  | 1                           |
| 82  | <i>FANCI</i> | HNSC         | 4.65E-03                                                | LUSC         | 0                                                       | 0.51               | 1                           |
| 83  | <i>FANCI</i> | HNSC         | 4.65E-03                                                | OV           | 0                                                       | 0.50               | 1                           |
| 84  | <i>FANCI</i> | HNSC         | 4.65E-03                                                | UCEC         | 5.51E-03                                                | 1                  | 1                           |
| 85  | <i>FANCI</i> | LUAD         | 5.19E-03                                                | LUSC         | 0                                                       | 0.50               | 1                           |
| 86  | <i>FANCI</i> | LUAD         | 5.19E-03                                                | OV           | 0                                                       | 0.50               | 1                           |
| 87  | <i>FANCI</i> | LUAD         | 5.19E-03                                                | UCEC         | 5.51E-03                                                | 1                  | 1                           |
| 88  | <i>FANCI</i> | LUSC         | 0                                                       | OV           | 0                                                       | 1                  | 1                           |
| 89  | <i>FANCI</i> | LUSC         | 0                                                       | UCEC         | 5.51E-03                                                | 0.50               | 1                           |
| 90  | <i>FANCI</i> | OV           | 0                                                       | UCEC         | 5.51E-03                                                | 0.24               | 1                           |
| 91  | <i>FANCL</i> | BRCA         | 7.22E-03                                                | HNSC         | 4.65E-03                                                | 0.71               | 1                           |
| 92  | <i>FANCL</i> | BRCA         | 7.22E-03                                                | LUAD         | 1.04E-02                                                | 0.73               | 1                           |
| 93  | <i>FANCL</i> | BRCA         | 7.22E-03                                                | LUSC         | 5.83E-03                                                | 1                  | 1                           |
| 94  | <i>FANCL</i> | BRCA         | 7.22E-03                                                | OV           | 1.57E-02                                                | 0.21               | 1                           |
| 95  | <i>FANCL</i> | BRCA         | 7.22E-03                                                | UCEC         | 5.51E-03                                                | 1                  | 1                           |
| 96  | <i>FANCL</i> | HNSC         | 4.65E-03                                                | LUAD         | 1.04E-02                                                | 0.43               | 1                           |
| 97  | <i>FANCL</i> | HNSC         | 4.65E-03                                                | LUSC         | 5.83E-03                                                | 1                  | 1                           |
| 98  | <i>FANCL</i> | HNSC         | 4.65E-03                                                | OV           | 1.57E-02                                                | 0.16               | 1                           |
| 99  | <i>FANCL</i> | HNSC         | 4.65E-03                                                | UCEC         | 5.51E-03                                                | 1                  | 1                           |
| 100 | <i>FANCL</i> | LUAD         | 1.04E-02                                                | LUSC         | 5.83E-03                                                | 0.69               | 1                           |
| 101 | <i>FANCL</i> | LUAD         | 1.04E-02                                                | OV           | 1.57E-02                                                | 0.54               | 1                           |
| 102 | <i>FANCL</i> | LUAD         | 1.04E-02                                                | UCEC         | 5.51E-03                                                | 0.69               | 1                           |
| 103 | <i>FANCL</i> | LUSC         | 5.83E-03                                                | OV           | 1.57E-02                                                | 0.29               | 1                           |
| 104 | <i>FANCL</i> | LUSC         | 5.83E-03                                                | UCEC         | 5.51E-03                                                | 1                  | 1                           |
| 105 | <i>FANCL</i> | OV           | 1.57E-02                                                | UCEC         | 5.51E-03                                                | 0.29               | 1                           |
| 106 | <i>FANCM</i> | BRCA         | 1.30E-02                                                | HNSC         | 6.98E-03                                                | 0.39               | 1                           |

| No. | Gene         | TCGA group 1 | Cohort size-normalized carrier frequency (TCGA group 1) | TCGA group 2 | Cohort size-normalized carrier frequency (TCGA group 2) | Unadjusted p-value | Bonferroni-adjusted p-value |
|-----|--------------|--------------|---------------------------------------------------------|--------------|---------------------------------------------------------|--------------------|-----------------------------|
| 107 | <i>FANCM</i> | BRCA         | 1.30E-02                                                | LUAD         | 5.19E-03                                                | 0.35               | 1                           |
| 108 | <i>FANCM</i> | BRCA         | 1.30E-02                                                | LUSC         | 2.92E-03                                                | 0.18               | 1                           |
| 109 | <i>FANCM</i> | BRCA         | 1.30E-02                                                | OV           | 0                                                       | 0.03               | 1                           |
| 110 | <i>FANCM</i> | BRCA         | 1.30E-02                                                | UCEC         | 2.75E-03                                                | 0.18               | 1                           |
| 111 | <i>FANCM</i> | HNSC         | 6.98E-03                                                | LUAD         | 5.19E-03                                                | 1                  | 1                           |
| 112 | <i>FANCM</i> | HNSC         | 6.98E-03                                                | LUSC         | 2.92E-03                                                | 0.63               | 1                           |
| 113 | <i>FANCM</i> | HNSC         | 6.98E-03                                                | OV           | 0                                                       | 0.25               | 1                           |
| 114 | <i>FANCM</i> | HNSC         | 6.98E-03                                                | UCEC         | 2.75E-03                                                | 0.63               | 1                           |
| 115 | <i>FANCM</i> | LUAD         | 5.19E-03                                                | LUSC         | 2.92E-03                                                | 1                  | 1                           |
| 116 | <i>FANCM</i> | LUAD         | 5.19E-03                                                | OV           | 0                                                       | 0.50               | 1                           |
| 117 | <i>FANCM</i> | LUAD         | 5.19E-03                                                | UCEC         | 2.75E-03                                                | 1                  | 1                           |
| 118 | <i>FANCM</i> | LUSC         | 2.92E-03                                                | OV           | 0                                                       | 0.47               | 1                           |
| 119 | <i>FANCM</i> | LUSC         | 2.92E-03                                                | UCEC         | 2.75E-03                                                | 1                  | 1                           |
| 120 | <i>FANCM</i> | OV           | 0                                                       | UCEC         | 2.75E-03                                                | 0.49               | 1                           |
| 121 | <i>SLX4</i>  | BRCA         | 1.44E-03                                                | HNSC         | 0                                                       | 1                  | 1                           |
| 122 | <i>SLX4</i>  | BRCA         | 1.44E-03                                                | LUAD         | 0                                                       | 1                  | 1                           |
| 123 | <i>SLX4</i>  | BRCA         | 1.44E-03                                                | LUSC         | 0                                                       | 1                  | 1                           |
| 124 | <i>SLX4</i>  | BRCA         | 1.44E-03                                                | OV           | 0                                                       | 1                  | 1                           |
| 125 | <i>SLX4</i>  | BRCA         | 1.44E-03                                                | UCEC         | 5.51E-03                                                | 0.27               | 1                           |
| 126 | <i>SLX4</i>  | HNSC         | 0                                                       | LUAD         | 0                                                       | 1                  | 1                           |
| 127 | <i>SLX4</i>  | HNSC         | 0                                                       | LUSC         | 0                                                       | 1                  | 1                           |
| 128 | <i>SLX4</i>  | HNSC         | 0                                                       | OV           | 0                                                       | 1                  | 1                           |
| 129 | <i>SLX4</i>  | HNSC         | 0                                                       | UCEC         | 5.51E-03                                                | 0.21               | 1                           |
| 130 | <i>SLX4</i>  | LUAD         | 0                                                       | LUSC         | 0                                                       | 1                  | 1                           |
| 131 | <i>SLX4</i>  | LUAD         | 0                                                       | OV           | 0                                                       | 1                  | 1                           |
| 132 | <i>SLX4</i>  | LUAD         | 0                                                       | UCEC         | 5.51E-03                                                | 0.24               | 1                           |
| 133 | <i>SLX4</i>  | LUSC         | 0                                                       | OV           | 0                                                       | 1                  | 1                           |



| No. | Gene         | TCGA group 1 | Cohort size-normalized carrier frequency (TCGA group 1) | TCGA group 2 | Cohort size-normalized carrier frequency (TCGA group 2) | Unadjusted p-value | Bonferroni-adjusted p-value |
|-----|--------------|--------------|---------------------------------------------------------|--------------|---------------------------------------------------------|--------------------|-----------------------------|
| 134 | <i>SLX4</i>  | LUSC         | 0                                                       | UCEC         | 5.51E-03                                                | 0.50               | 1                           |
| 135 | <i>SLX4</i>  | OV           | 0                                                       | UCEC         | 5.51E-03                                                | 0.24               | 1                           |
| 136 | <i>ERCC4</i> | BRCA         | 0                                                       | HNSC         | 2.33E-03                                                | 0.38               | 1                           |
| 137 | <i>ERCC4</i> | BRCA         | 0                                                       | LUAD         | 0                                                       | 1                  | 1                           |
| 138 | <i>ERCC4</i> | BRCA         | 0                                                       | LUSC         | 0                                                       | 1                  | 1                           |
| 139 | <i>ERCC4</i> | BRCA         | 0                                                       | OV           | 0                                                       | 1                  | 1                           |
| 140 | <i>ERCC4</i> | BRCA         | 0                                                       | UCEC         | 0                                                       | 1                  | 1                           |
| 141 | <i>ERCC4</i> | HNSC         | 2.33E-03                                                | LUAD         | 0                                                       | 1                  | 1                           |
| 142 | <i>ERCC4</i> | HNSC         | 2.33E-03                                                | LUSC         | 0                                                       | 1                  | 1                           |
| 143 | <i>ERCC4</i> | HNSC         | 2.33E-03                                                | OV           | 0                                                       | 1                  | 1                           |
| 144 | <i>ERCC4</i> | HNSC         | 2.33E-03                                                | UCEC         | 0                                                       | 1                  | 1                           |
| 145 | <i>ERCC4</i> | LUAD         | 0                                                       | LUSC         | 0                                                       | 1                  | 1                           |
| 146 | <i>ERCC4</i> | LUAD         | 0                                                       | OV           | 0                                                       | 1                  | 1                           |
| 147 | <i>ERCC4</i> | LUAD         | 0                                                       | UCEC         | 0                                                       | 1                  | 1                           |
| 148 | <i>ERCC4</i> | LUSC         | 0                                                       | OV           | 0                                                       | 1                  | 1                           |
| 149 | <i>ERCC4</i> | LUSC         | 0                                                       | UCEC         | 0                                                       | 1                  | 1                           |
| 150 | <i>ERCC4</i> | OV           | 0                                                       | UCEC         | 0                                                       | 1                  | 1                           |
| 151 | <i>UBE2T</i> | BRCA         | 0                                                       | HNSC         | 0                                                       | 1                  | 1                           |
| 152 | <i>UBE2T</i> | BRCA         | 0                                                       | LUAD         | 0                                                       | 1                  | 1                           |
| 153 | <i>UBE2T</i> | BRCA         | 0                                                       | LUSC         | 0                                                       | 1                  | 1                           |
| 154 | <i>UBE2T</i> | BRCA         | 0                                                       | OV           | 2.62E-03                                                | 0.35               | 1                           |
| 155 | <i>UBE2T</i> | BRCA         | 0                                                       | UCEC         | 0                                                       | 1                  | 1                           |
| 156 | <i>UBE2T</i> | HNSC         | 0                                                       | LUAD         | 0                                                       | 1                  | 1                           |
| 157 | <i>UBE2T</i> | HNSC         | 0                                                       | LUSC         | 0                                                       | 1                  | 1                           |
| 158 | <i>UBE2T</i> | HNSC         | 0                                                       | OV           | 2.62E-03                                                | 0.47               | 1                           |
| 159 | <i>UBE2T</i> | HNSC         | 0                                                       | UCEC         | 0                                                       | 1                  | 1                           |
| 160 | <i>UBE2T</i> | LUAD         | 0                                                       | LUSC         | 0                                                       | 1                  | 1                           |

| No. | Gene         | TCGA group 1 | Cohort size-normalized carrier frequency (TCGA group 1) | TCGA group 2 | Cohort size-normalized carrier frequency (TCGA group 2) | Unadjusted p-value | Bonferroni-adjusted p-value |
|-----|--------------|--------------|---------------------------------------------------------|--------------|---------------------------------------------------------|--------------------|-----------------------------|
| 161 | <i>UBE2T</i> | LUAD         | 0                                                       | OV           | 2.62E-03                                                | 0.50               | 1                           |
| 162 | <i>UBE2T</i> | LUAD         | 0                                                       | UCEC         | 0                                                       | 1                  | 1                           |
| 163 | <i>UBE2T</i> | LUSC         | 0                                                       | OV           | 2.62E-03                                                | 1                  | 1                           |
| 164 | <i>UBE2T</i> | LUSC         | 0                                                       | UCEC         | 0                                                       | 1                  | 1                           |
| 165 | <i>UBE2T</i> | OV           | 2.62E-03                                                | UCEC         | 0                                                       | 1                  | 1                           |
| 166 | <i>XRCC2</i> | BRCA         | 5.77E-03                                                | HNSC         | 0                                                       | 0.30               | 1                           |
| 167 | <i>XRCC2</i> | BRCA         | 5.77E-03                                                | LUAD         | 2.60E-03                                                | 0.66               | 1                           |
| 168 | <i>XRCC2</i> | BRCA         | 5.77E-03                                                | LUSC         | 0                                                       | 0.31               | 1                           |
| 169 | <i>XRCC2</i> | BRCA         | 5.77E-03                                                | OV           | 0                                                       | 0.30               | 1                           |
| 170 | <i>XRCC2</i> | BRCA         | 5.77E-03                                                | UCEC         | 0                                                       | 0.31               | 1                           |
| 171 | <i>XRCC2</i> | HNSC         | 0                                                       | LUAD         | 2.60E-03                                                | 0.47               | 1                           |
| 172 | <i>XRCC2</i> | HNSC         | 0                                                       | LUSC         | 0                                                       | 1                  | 1                           |
| 173 | <i>XRCC2</i> | HNSC         | 0                                                       | OV           | 0                                                       | 1                  | 1                           |
| 174 | <i>XRCC2</i> | HNSC         | 0                                                       | UCEC         | 0                                                       | 1                  | 1                           |
| 175 | <i>XRCC2</i> | LUAD         | 2.60E-03                                                | LUSC         | 0                                                       | 1                  | 1                           |
| 176 | <i>XRCC2</i> | LUAD         | 2.60E-03                                                | OV           | 0                                                       | 1                  | 1                           |
| 177 | <i>XRCC2</i> | LUAD         | 2.60E-03                                                | UCEC         | 0                                                       | 1                  | 1                           |
| 178 | <i>XRCC2</i> | LUSC         | 0                                                       | OV           | 0                                                       | 1                  | 1                           |
| 179 | <i>XRCC2</i> | LUSC         | 0                                                       | UCEC         | 0                                                       | 1                  | 1                           |
| 180 | <i>XRCC2</i> | OV           | 0                                                       | UCEC         | 0                                                       | 1                  | 1                           |
| 181 | <i>RFWD3</i> | BRCA         | 0                                                       | HNSC         | 0                                                       | 1                  | 1                           |
| 182 | <i>RFWD3</i> | BRCA         | 0                                                       | LUAD         | 0                                                       | 1                  | 1                           |
| 183 | <i>RFWD3</i> | BRCA         | 0                                                       | LUSC         | 2.92E-03                                                | 0.33               | 1                           |
| 184 | <i>RFWD3</i> | BRCA         | 0                                                       | OV           | 0                                                       | 1                  | 1                           |
| 185 | <i>RFWD3</i> | BRCA         | 0                                                       | UCEC         | 0                                                       | 1                  | 1                           |
| 186 | <i>RFWD3</i> | HNSC         | 0                                                       | LUAD         | 0                                                       | 1                  | 1                           |
| 187 | <i>RFWD3</i> | HNSC         | 0                                                       | LUSC         | 2.92E-03                                                | 0.44               | 1                           |

| No. | Gene         | TCGA group 1 | Cohort size-normalized carrier frequency (TCGA group 1) | TCGA group 2 | Cohort size-normalized carrier frequency (TCGA group 2) | Unadjusted p-value | Bonferroni-adjusted p-value |
|-----|--------------|--------------|---------------------------------------------------------|--------------|---------------------------------------------------------|--------------------|-----------------------------|
| 188 | <i>RFWD3</i> | HNSC         | 0                                                       | OV           | 0                                                       | 1                  | 1                           |
| 189 | <i>RFWD3</i> | HNSC         | 0                                                       | UCEC         | 0                                                       | 1                  | 1                           |
| 190 | <i>RFWD3</i> | LUAD         | 0                                                       | LUSC         | 2.92E-03                                                | 0.47               | 1                           |
| 191 | <i>RFWD3</i> | LUAD         | 0                                                       | OV           | 0                                                       | 1                  | 1                           |
| 192 | <i>RFWD3</i> | LUAD         | 0                                                       | UCEC         | 0                                                       | 1                  | 1                           |
| 193 | <i>RFWD3</i> | LUSC         | 2.92E-03                                                | OV           | 0                                                       | 0.47               | 1                           |
| 194 | <i>RFWD3</i> | LUSC         | 2.92E-03                                                | UCEC         | 0                                                       | 0.49               | 1                           |
| 195 | <i>RFWD3</i> | OV           | 0                                                       | UCEC         | 0                                                       | 1                  | 1                           |

<sup>a</sup> Adjusted p value threshold of <0.05 is considered significant event. BRCA: breast invasive carcinoma, HNSC: head and neck squamous cell carcinoma, LUAD: lung adenocarcinoma, LUSC: lung squamous cell carcinoma, OV: ovarian serous cystadenocarcinoma, UCEC: uterine corpus endometrial carcinoma. The uterine carcinosarcoma (UCS) cohort was not included due to the lack of germline variant carriers.

**Supplementary Table 7: Carrier frequency of potentially pathogenic somatic variants identified in White (non-Hispanic) racial subset of patients without known POLE/POLD1 somatic driver mutations from the selected TCGA cohorts<sup>a</sup>**

| TCGA cohort   | TCGA-BRCA    |                    | TCGA-HNSC    |                    | TCGA-LUAD    |                    | TCGA-LUSC    |                    | TCGA-OV      |                    | TCGA-UCEC    |                    | TCGA-UCS     |                    |
|---------------|--------------|--------------------|--------------|--------------------|--------------|--------------------|--------------|--------------------|--------------|--------------------|--------------|--------------------|--------------|--------------------|
| No. patients  | 721          |                    | 431          |                    | 386          |                    | 344          |                    | 488          |                    | 337          |                    | 43           |                    |
|               | No. carriers | Carrier frequency* |
| <i>FANCA</i>  | 2            | 0.28%              | 3            | 0.70%              | 4            | 1.04%              | 7            | 2.03%              | 4            | 0.82%              | 6            | 1.78%              | 0            | 0                  |
| <i>FANCB</i>  | 3            | 0.42%              | 2            | 0.46%              | 2            | 0.52%              | 4            | 1.16%              | 1            | 0.20%              | 3            | 0.89%              | 1            | 2.33%              |
| <i>FANCC</i>  | 0            | 0                  | 2            | 0.46%              | 0            | 0                  | 2            | 0.58%              | 1            | 0.20%              | 1            | 0.30%              | 0            | 0                  |
| <i>FANCD2</i> | 5            | 0.69%              | 5            | 1.16%              | 1            | 0.26%              | 5            | 1.45%              | 4            | 0.82%              | 7            | 2.08%              | 0            | 0                  |
| <i>FANCE</i>  | 0            | 0                  | 0            | 0                  | 2            | 0.52%              | 1            | 0.29%              | 4            | 0.82%              | 7            | 2.08%              | 0            | 0                  |
| <i>FANCF</i>  | 1            | 0.14%              | 1            | 0.23%              | 1            | 0.26%              | 5            | 1.45%              | 1            | 0.20%              | 0            | 0                  | 0            | 0                  |
| <i>FANCG</i>  | 3            | 0.42%              | 0            | 0                  | 2            | 0.52%              | 2            | 0.58%              | 1            | 0.20%              | 4            | 1.19%              | 0            | 0                  |
| <i>FANCI</i>  | 4            | 0.55%              | 6            | 1.39%              | 5            | 1.30%              | 5            | 1.45%              | 3            | 0.61%              | 10           | 2.97%              | 0            | 0                  |
| <i>FANCL</i>  | 1            | 0.14%              | 1            | 0.23%              | 0            | 0                  | 2            | 0.58%              | 2            | 0.41%              | 1            | 0.30%              | 0            | 0                  |
| <i>FANCM</i>  | 1            | 0.14%              | 6            | 1.39%              | 15           | 3.89%              | 11           | 3.20%              | 3            | 0.61%              | 8            | 2.37%              | 1            | 2.33%              |
| <i>SLX4</i>   | 4            | 0.55%              | 4            | 0.93%              | 4            | 1.04%              | 5            | 1.45%              | 12           | 2.46%              | 10           | 2.97%              | 0            | 0                  |
| <i>ERCC4</i>  | 3            | 0.42%              | 3            | 0.70%              | 6            | 1.55%              | 3            | 0.87%              | 4            | 0.82%              | 12           | 3.56%              | 0            | 0                  |
| <i>RAD51</i>  | 1            | 0.14%              | 1            | 0.23%              | 0            | 0                  | 1            | 0.29%              | 1            | 0.20%              | 2            | 0.59%              | 0            | 0                  |
| <i>UBE2T</i>  | 0            | 0                  | 0            | 0                  | 2            | 0.52%              | 1            | 0.29%              | 0            | 0                  | 1            | 0.30%              | 0            | 0                  |
| <i>XRCC2</i>  | 2            | 0.28%              | 1            | 0.23%              | 4            | 1.04%              | 1            | 0.29%              | 0            | 0                  | 2            | 0.59%              | 0            | 0                  |
| <i>MAD2L2</i> | 0            | 0                  | 0            | 0                  | 1            | 0.26%              | 0            | 0                  | 3            | 0.61%              | 2            | 0.59%              | 0            | 0                  |
| <i>RFWD3</i>  | 1            | 0.14%              | 3            | 0.70%              | 2            | 0.52%              | 2            | 0.58%              | 1            | 0.20%              | 1            | 0.30%              | 0            | 0                  |

<sup>a</sup>Fisher's exact test for pairwise comparisons with Bonferroni correction did not indicate any statistically significant events ( $p < 0.05$  considered significant event). \*Carrier frequency is normalized to number of cases with available somatic data. TCGA-BRCA: breast invasive carcinoma, TCGA-HNSC: head and neck squamous cell carcinoma, TCGA-LUAD: lung adenocarcinoma, TCGA-LUSC: lung squamous cell carcinoma, TCGA-OV: ovarian serous cystadenocarcinoma, TCGA-UCEC: uterine corpus endometrial carcinoma, TCGA-UCS: uterine carcinosarcoma

**Supplementary Figure 1:** Frequency of potentially pathogenic germline variant carriers in FA genes for 6 TCGA cancer cohorts. Color gradient is scaled to carrier frequency adjusted to cohort size. Numbers within the matrix indicate the number of variant carriers. Color map is not clustered by row or column. Fisher's exact test for statistical significance was performed with Bonferroni-correction of p-values applied for multiple testing (195 tests) but no significant events were identified ( $p < 0.05$  considered significant event, see Supplementary Table 6 for pairwise p-values). n: number of individuals with germline data. BRCA: breast invasive carcinoma, HNSC: head and neck squamous cell carcinoma, LUAD: lung adenocarcinoma, LUSC: lung squamous cell carcinoma, OV: ovarian serous cystadenocarcinoma, UCEC: uterine corpus endometrial carcinoma.

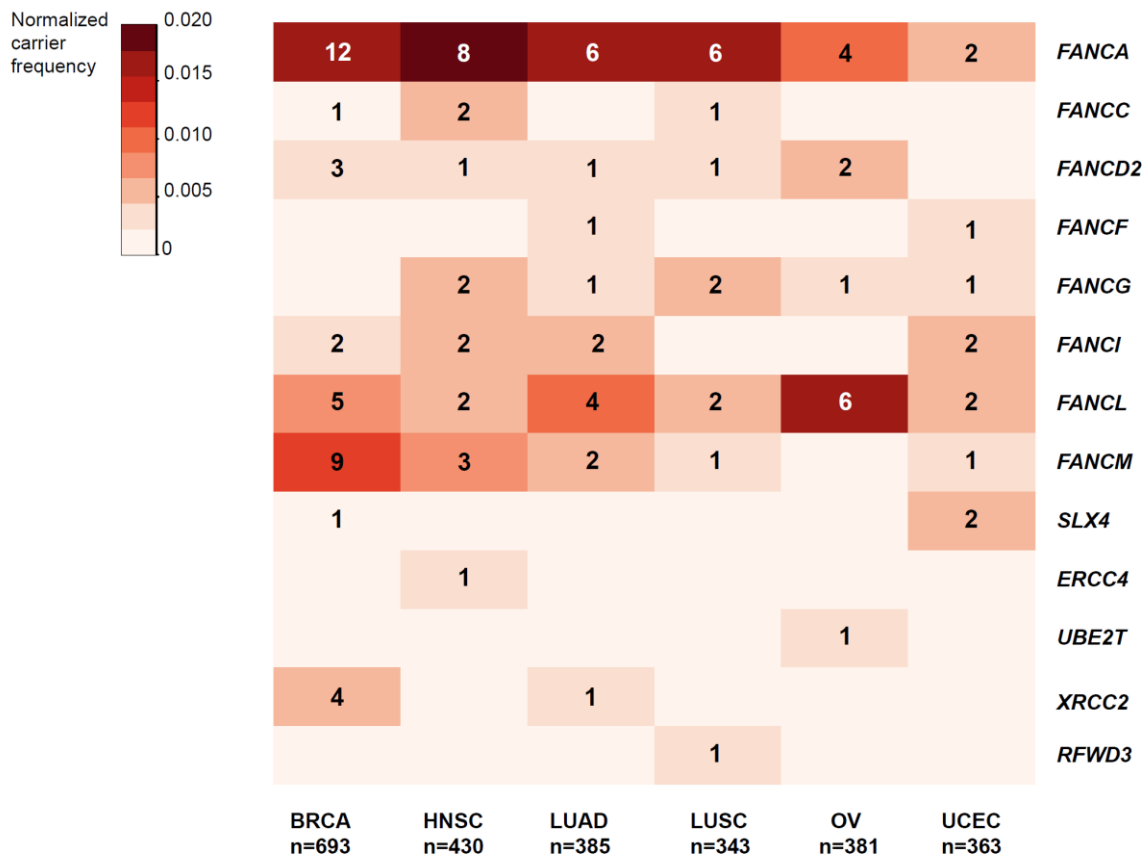

Supplement: pkaa117_supplementary_data.pdf [file pkaa117_supplementary_data.pdf]
